# Supplementary material for: Benzochromenopyrimidines: Synthesis, Antiproliferative Activity against Colorectal Cancer and Physicochemical Properties
Source: MDPI journal article supplement (doi:10.3390/molecules27227878), 2022-11-15
Supplement: s1 [file s1]

## SUPPLEMENTARY DATA

NMR and HRMS spectra of compounds **3a-j**

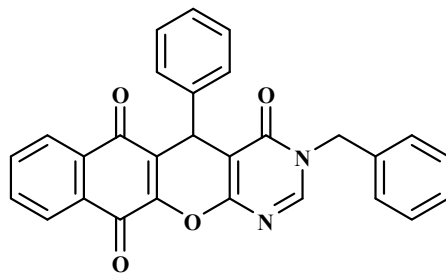

**3-Benzyl-5-phenyl-3,5-dihydro-4H-benzo[6,7]chromeno[2,3-d]pyrimidine-4,6,11-trione (3a):** It was obtained as a light yellow solid, yield: 59%, m.p.: > 260 °C.  $^1\text{H}$  NMR (400 MHz, DMSO-*d*6)  $\delta_{\text{H}}$  (ppm): 8.73 (s, 1H,  $\text{CH}_{\text{pyrimidine}}$ ), 8.10-8.07 (m, 1H), 7.93-7.91 (m, 1H), 7.89-7.85 (m, 2H), 7.38 (d,  $J$ = 7.4 Hz, 2H), 7.32-7.24 (m, 7H), 7.19-7.15 (m, 1H), 5.14 (d,  $J$ = 14.7 Hz, 1H,  $\text{CH}_2$ ), 5.13 (s, 1H,  $\text{CH}_{\text{pyran}}$ ), 4.98 (d,  $J$ = 14.7 Hz, 1H,  $\text{CH}_2$ ).  $^{13}\text{C}$  NMR (100 MHz, DMSO-*d*6)  $\delta_{\text{C}}$  (ppm): 183.0, 177.5, 160.4, 159.7, 152.2, 150.1, 142.4, 136.4, 135.1, 134.7, 131.5, 131.1, 129.1 (2C), 129.0 (2C), 128.7 (2C), 128.3, 128.2 (2C), 127.5, 126.6, 126.3, 123.3, 103.7, 49.8, 34.8. HRMS (ESI,  $\text{M}+\text{H}^+$ ): calcd for  $\text{C}_{28}\text{H}_{19}\text{N}_2\text{O}_4$ ; 447.1345, found; 447.1339.



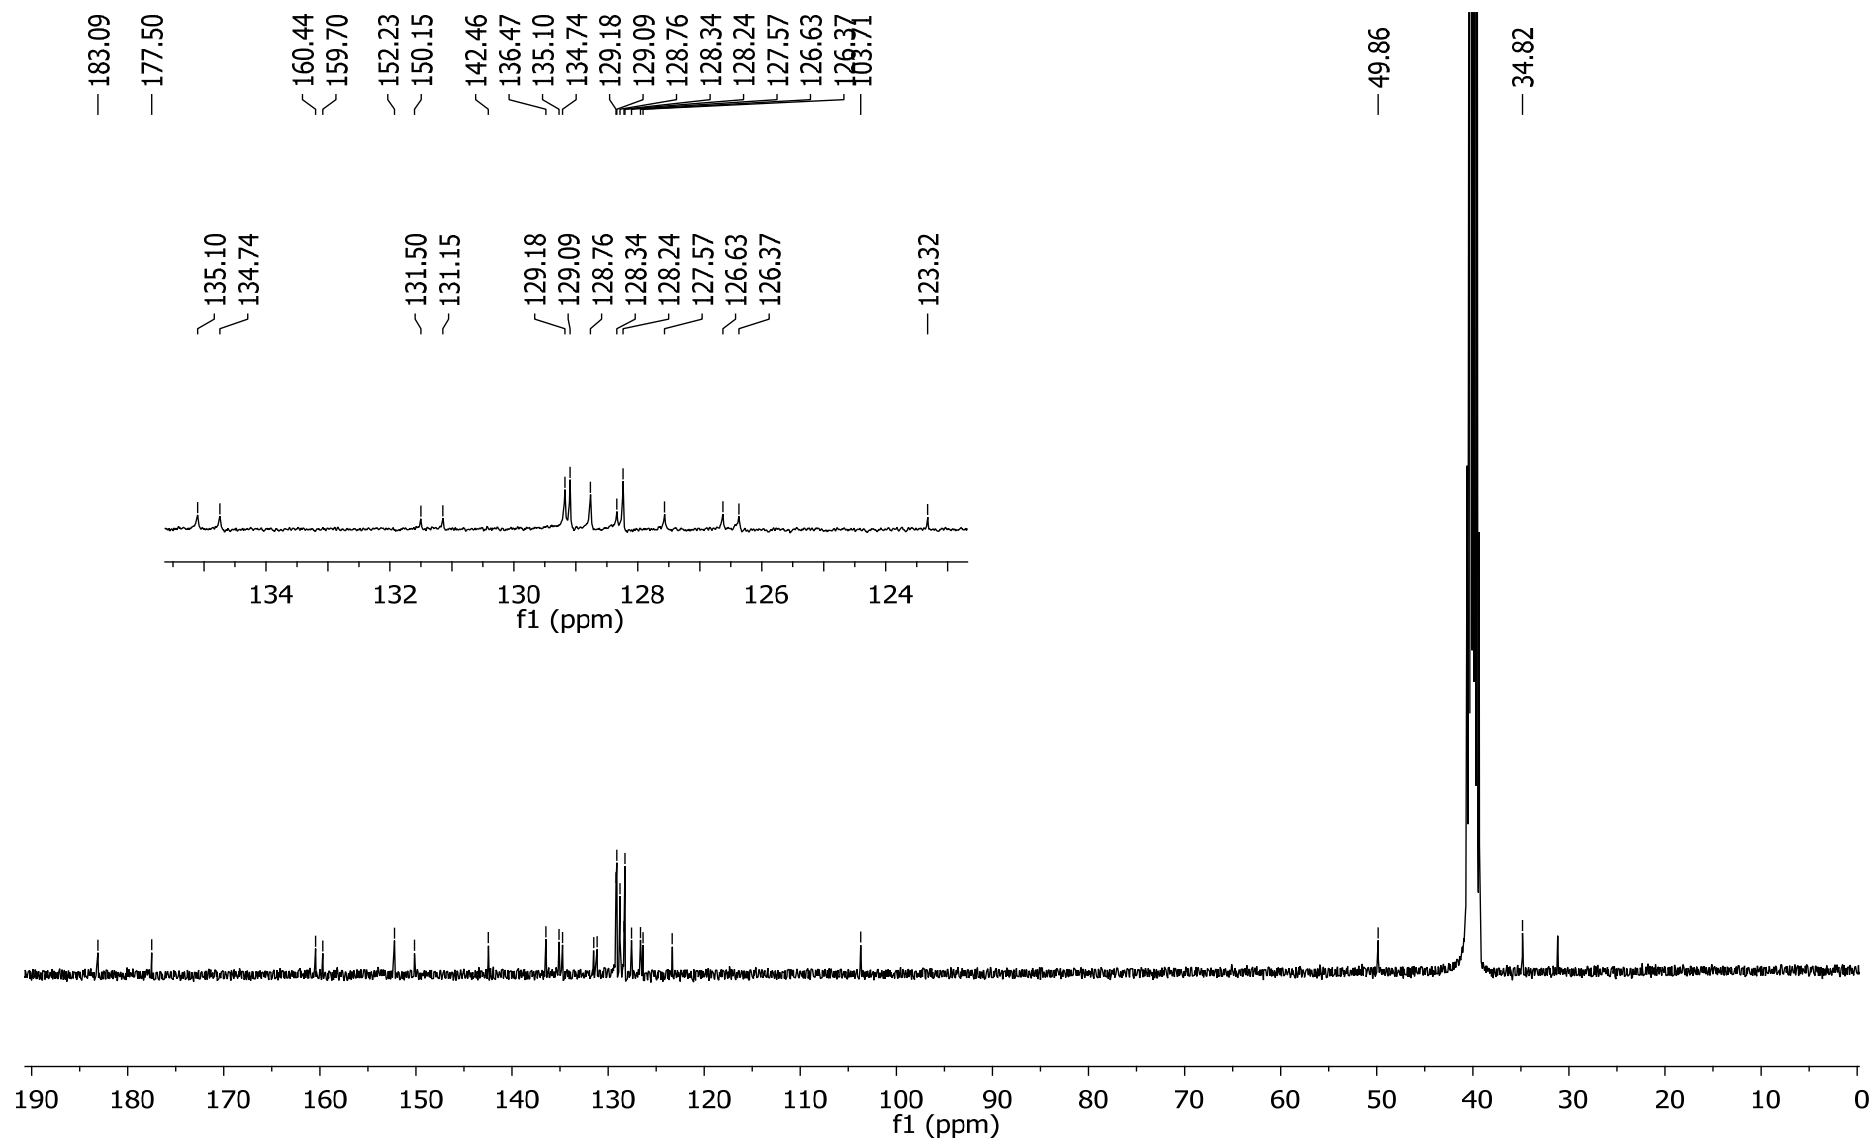

$^{13}\text{C}$  NMR of compound **3a** (100 MHz,  $\text{DMSO}-d_6$ )

EmCh-8-A #81 RT: 0.79 AV: 1 NL: 1.12E8

T: FTMS + p ESI Full ms [50.0000-750.0000]

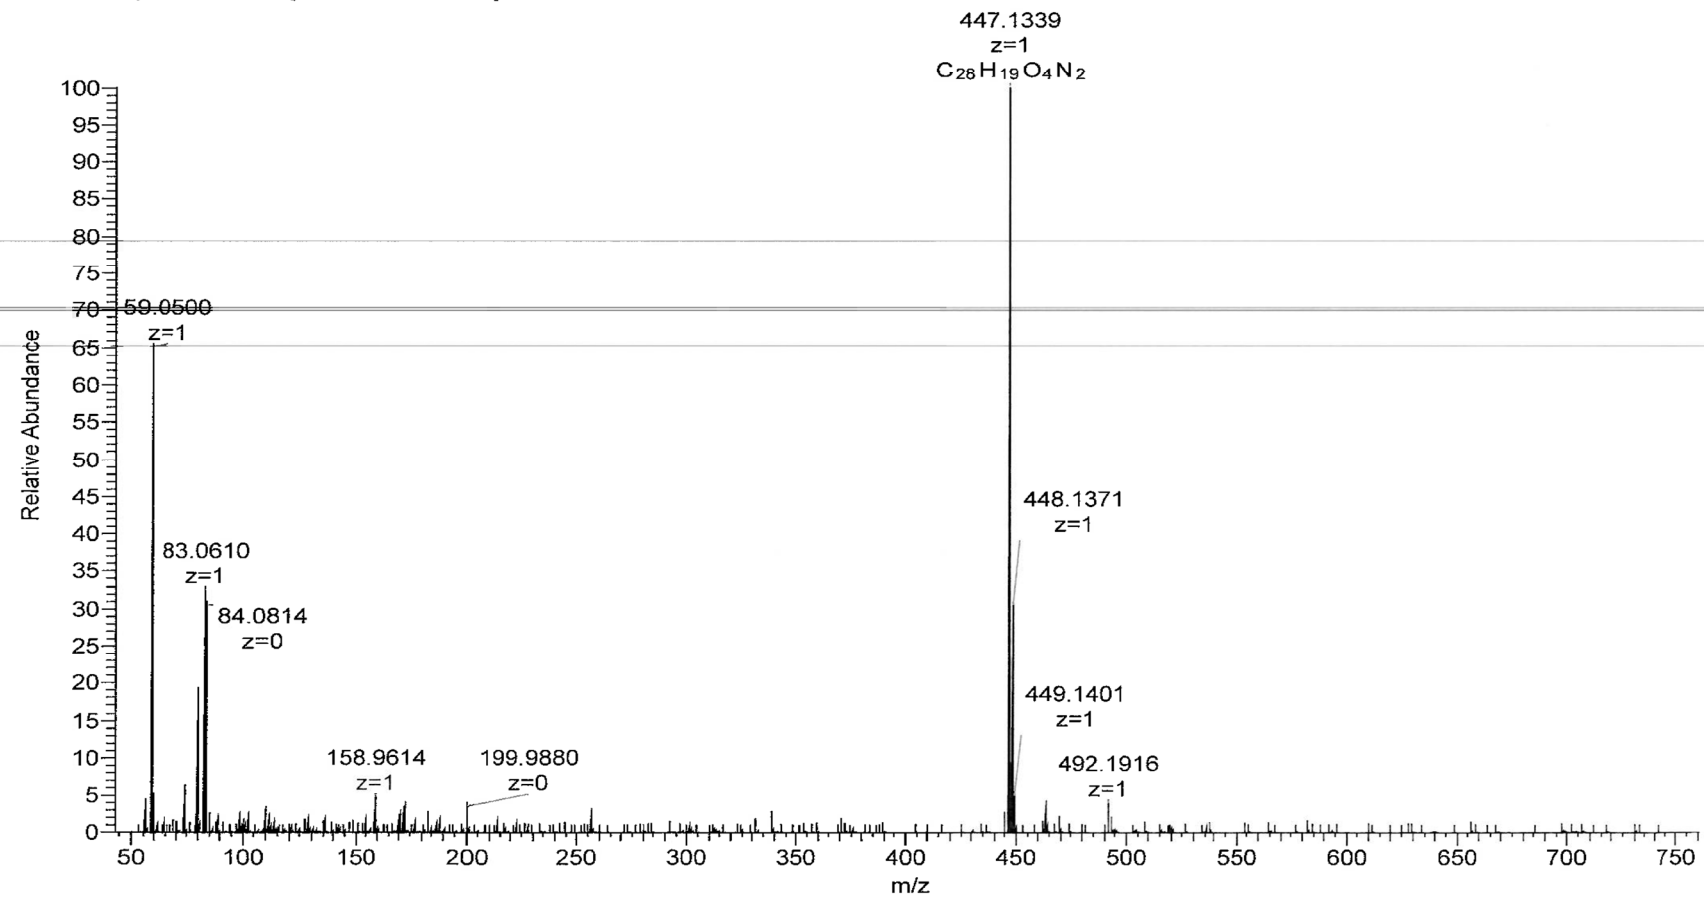

| Peak Mass | Display Formula      | Delta [ppm] | Theo. mass | Combined Score | Pattern Cov. [%] | MSMS Matched Fragments (Collection) |
|-----------|----------------------|-------------|------------|----------------|------------------|-------------------------------------|
| 447.1339  | $C_{28}H_{19}O_4N_2$ | -0.19       | 447.13393  | 99.12          | 100              |                                     |

HRMS spectrum of compound **3a** (ESI,  $M+H^+$ )

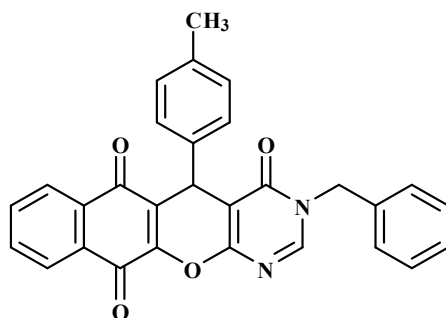

**3-Benzyl-5-(*p*-tolyl)-3,5-dihydro-4*H*-benzo[6,7]chromeno[2,3-*d*]pyrimidine-4,6,11-trione (3b):** It was obtained as an olive green solid, yield: 53%, m.p.: 252-254 °C.  $^1\text{H}$  NMR (400 MHz, DMSO-*d*6)  $\delta_{\text{H}}$  (ppm): 8.71 (s, 1H,  $\text{CH}_{\text{pyrimidine}}$ ), 8.09-8.07 (m, 1H), 7.90-7.86 (m, 3H), 7.30-7.24 (m, 7H), 7.05 (d,  $J = 7.1$  Hz, 2H), 5.12 (d,  $J = 14.7$  Hz, 1H,  $\text{CH}_2$ ), 5.08 (s, 1H,  $\text{CH}_{\text{pyran}}$ ), 4.98 (d,  $J = 14.7$  Hz, 1H,  $\text{CH}_2$ ), 2.20 (s, 3H,  $\text{CH}_3$ ).  $^{13}\text{C}$  NMR (100 MHz, DMSO-*d*6)  $\delta_{\text{C}}$  (ppm): 183.0, 177.5, 160.4, 159.6, 152.1, 149.9, 139.5, 136.8, 136.4, 135.1, 134.7, 131.5, 131.0, 129.3 (2C), 129.1 (2C), 129.0 (2C), 128.3, 128.2 (2C), 126.6, 126.3, 123.5, 100.8, 49.8, 34.3, 21.0. HRMS (ESI,  $\text{M} + \text{H}^+$ ): calcd for  $\text{C}_{29}\text{H}_{21}\text{N}_2\text{O}_4$ ; 461.1501, found; 461.1494.

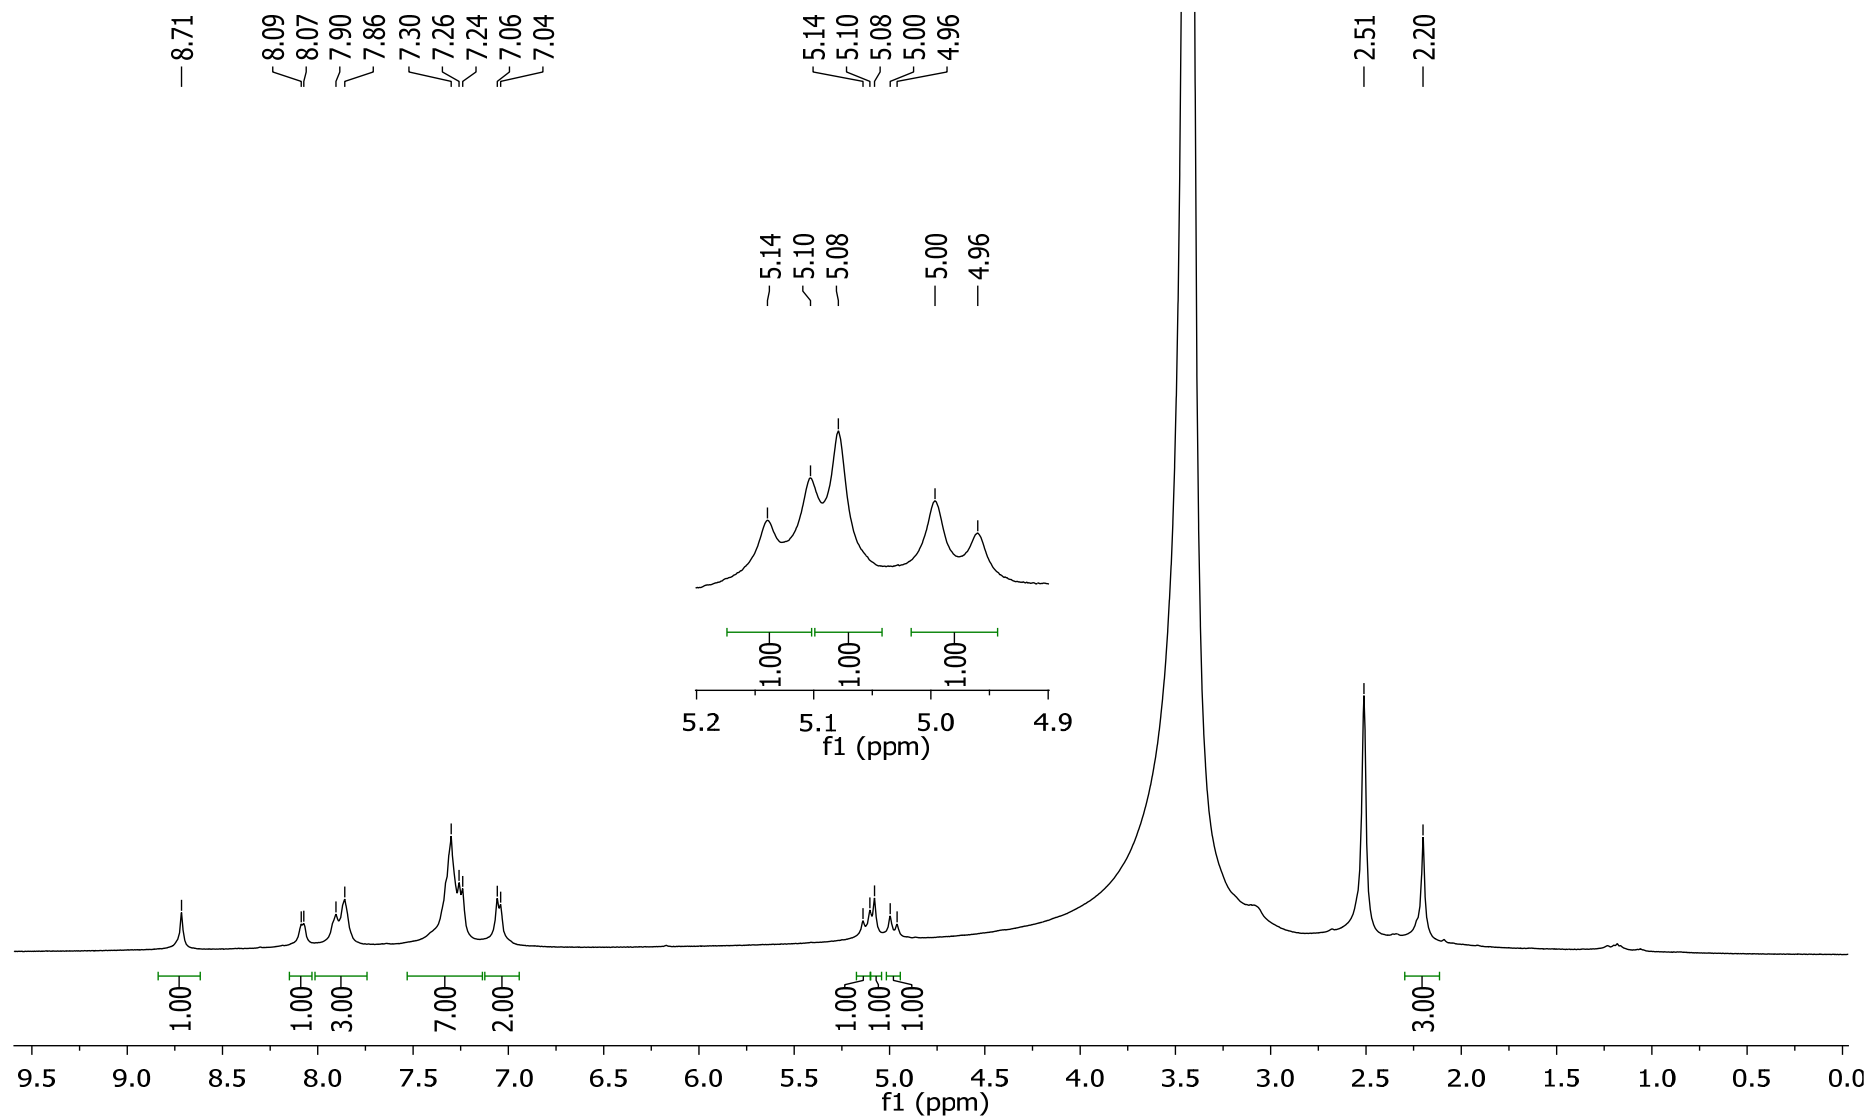

<sup>1</sup>H NMR of compound **3b** (400 MHz, DMSO-*d*<sub>6</sub>)

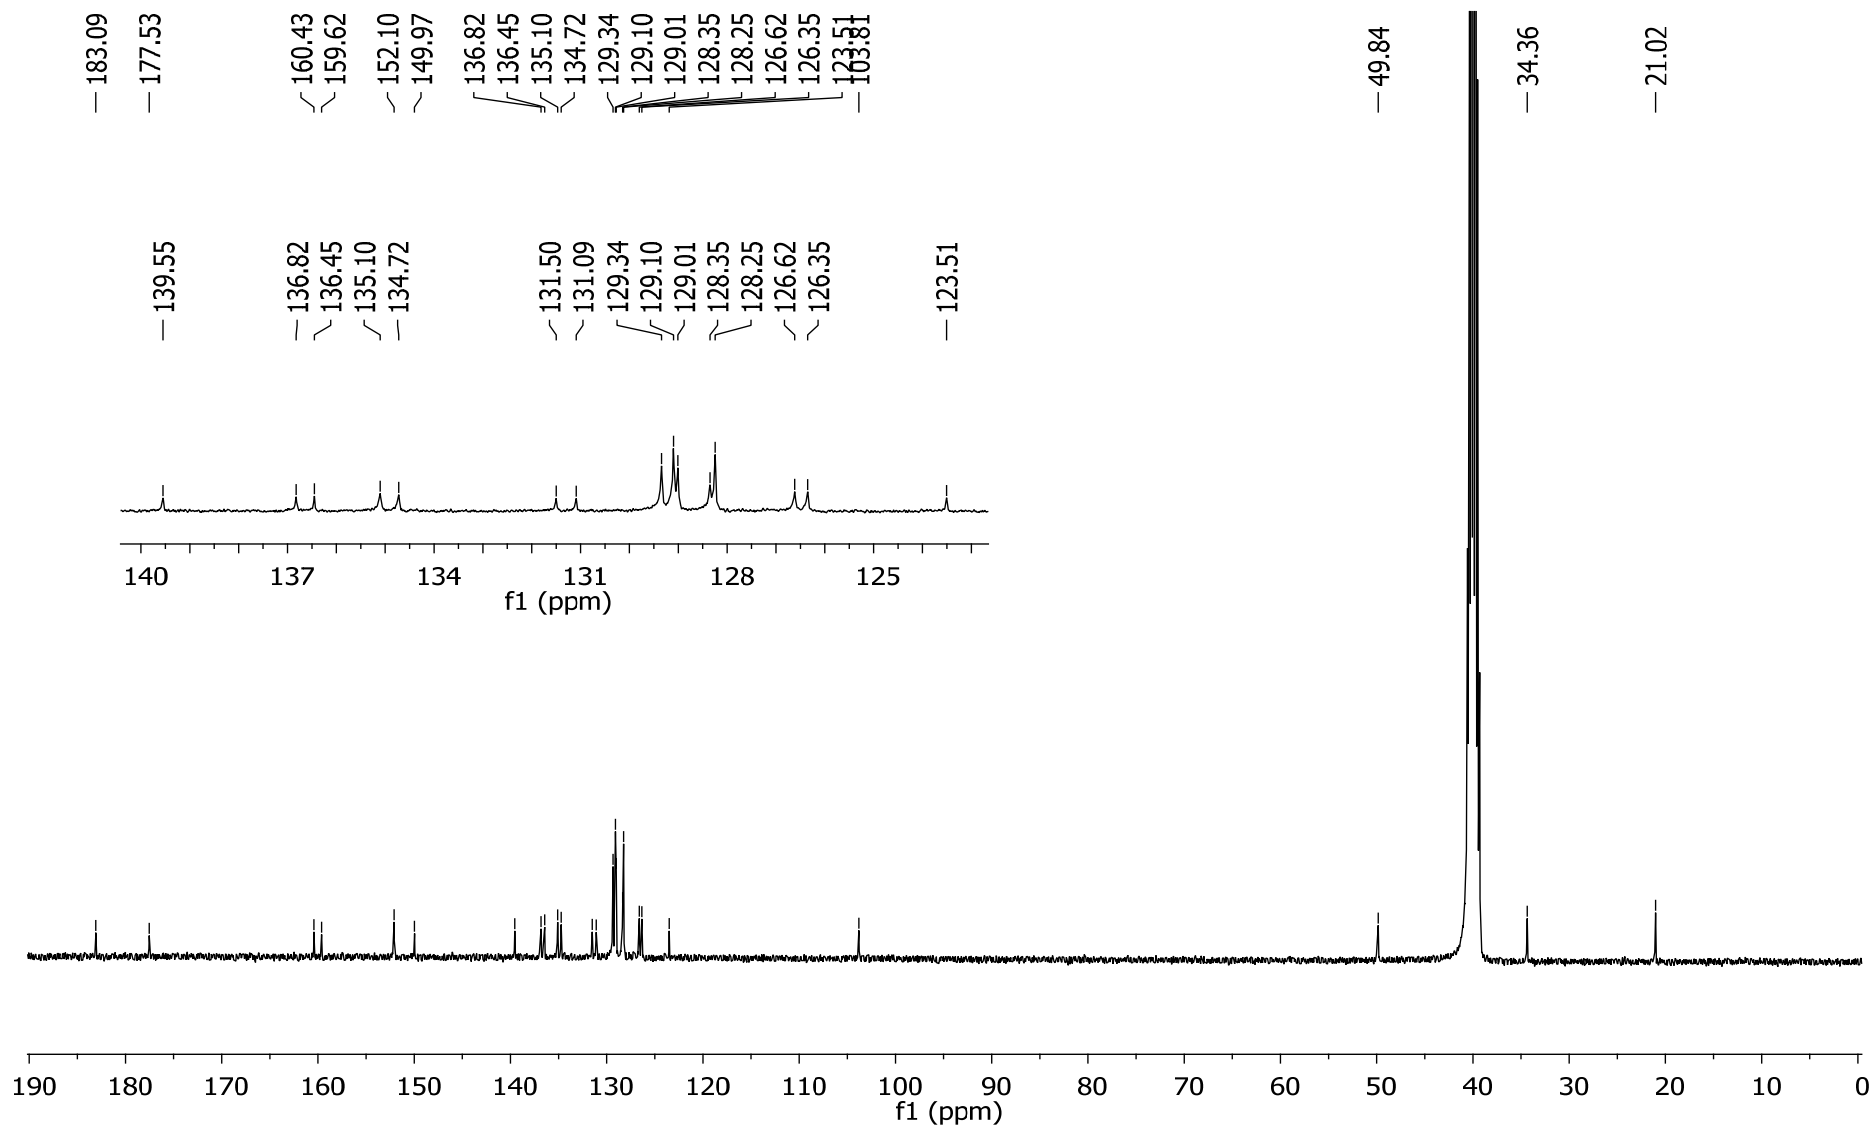

<sup>13</sup>C NMR of compound **3b** (100 MHz, DMSO-*d*<sub>6</sub>)

EmCh-8-B #95 RT: 0.93 AV: 1 NL: 6.05E8

T: FTMS + p ESI Full ms [50.0000-750.0000]

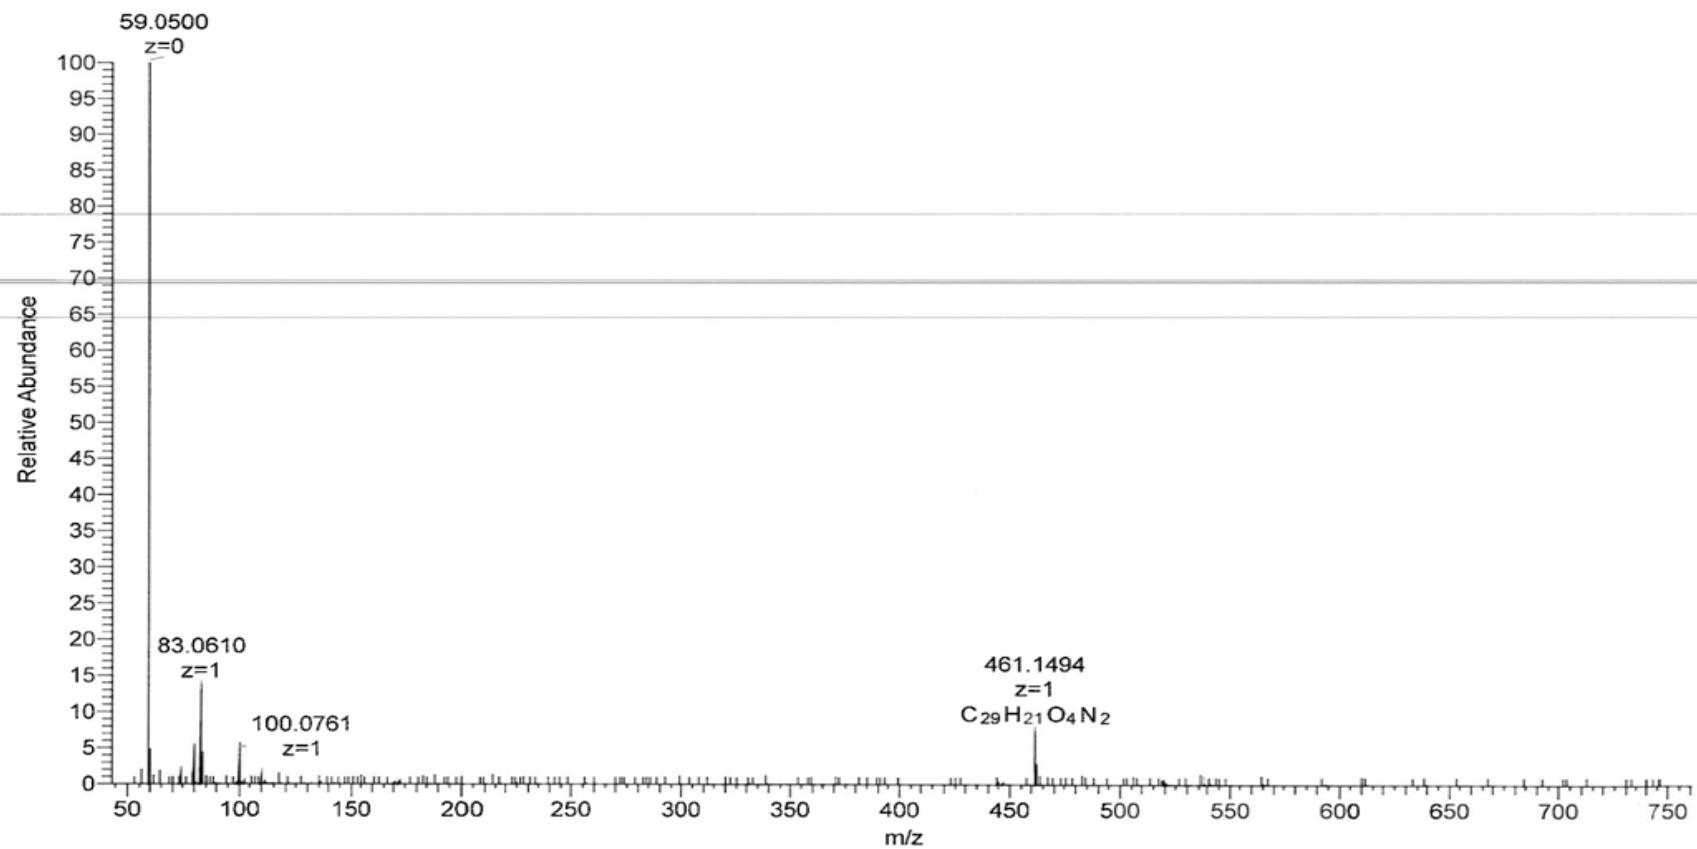

| Peak Mass | Display Formula      | Delta [ppm] | Theo. mass | Combined Score | Pattern Cov. [%] | MSMS Matched Fragments (Collection) |
|-----------|----------------------|-------------|------------|----------------|------------------|-------------------------------------|
| 461.1494  | $C_{29}H_{21}O_4N_2$ | -0.43       | 461.14958  | 96.44          | 99.49            |                                     |

HRMS spectrum of compound **3b** (ESI,  $M+H^+$ )



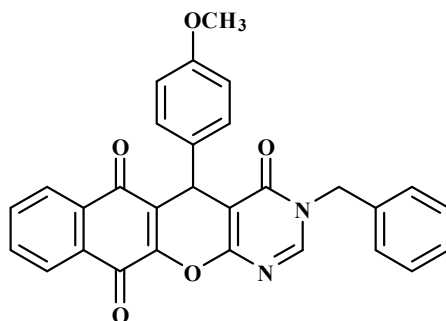

**3-Benzyl-5-(4-methoxyphenyl)-3,5-dihydro-4H-benzo[6,7]chromeno[2,3-d]pyrimidine-4,6,11-trione (3c):** It was obtained as an ochre yellow solid, yield: 60%, m.p.: > 260 °C.  $^1\text{H}$  NMR (400 MHz, DMSO-*d*6)  $\delta_{\text{H}}$  (ppm): 8.71 (s, 1H,  $\text{CH}_{\text{pyrimidine}}$ ), 8.09-8.07 (m, 1H), 7.92-7.86 (m, 3H), 7.31 (m, 7H), 6.80 (d,  $J = 7.6$  Hz, 2H), 5.12 (d,  $J = 14.2$  Hz, 1H,  $\text{CH}_2$ ), 5.07 (s, 1H,  $\text{CH}_{\text{pyran}}$ ), 4.98 (d,  $J = 14.2$  Hz, 1H,  $\text{CH}_2$ ), 3.68 (s, 3H,  $\text{OCH}_3$ ).  $^{13}\text{C}$  NMR (100 MHz, DMSO-*d*6)  $\delta_{\text{C}}$  (ppm): 183.1, 177.5, 160.4, 159.5, 158.7, 152.0, 149.8, 136.4, 135.1, 134.7, 134.6, 131.5, 131.1, 130.2 (2C), 129.1 (2C), 128.3, 128.2 (2C), 126.6, 126.3, 123.4, 114.1 (2C), 103.8, 55.4, 49.8, 33.9. HRMS (ESI,  $\text{M} + \text{H}^+$ ): calcd for  $\text{C}_{29}\text{H}_{21}\text{N}_2\text{O}_5$ ; 477.1450, found; 477.1443.

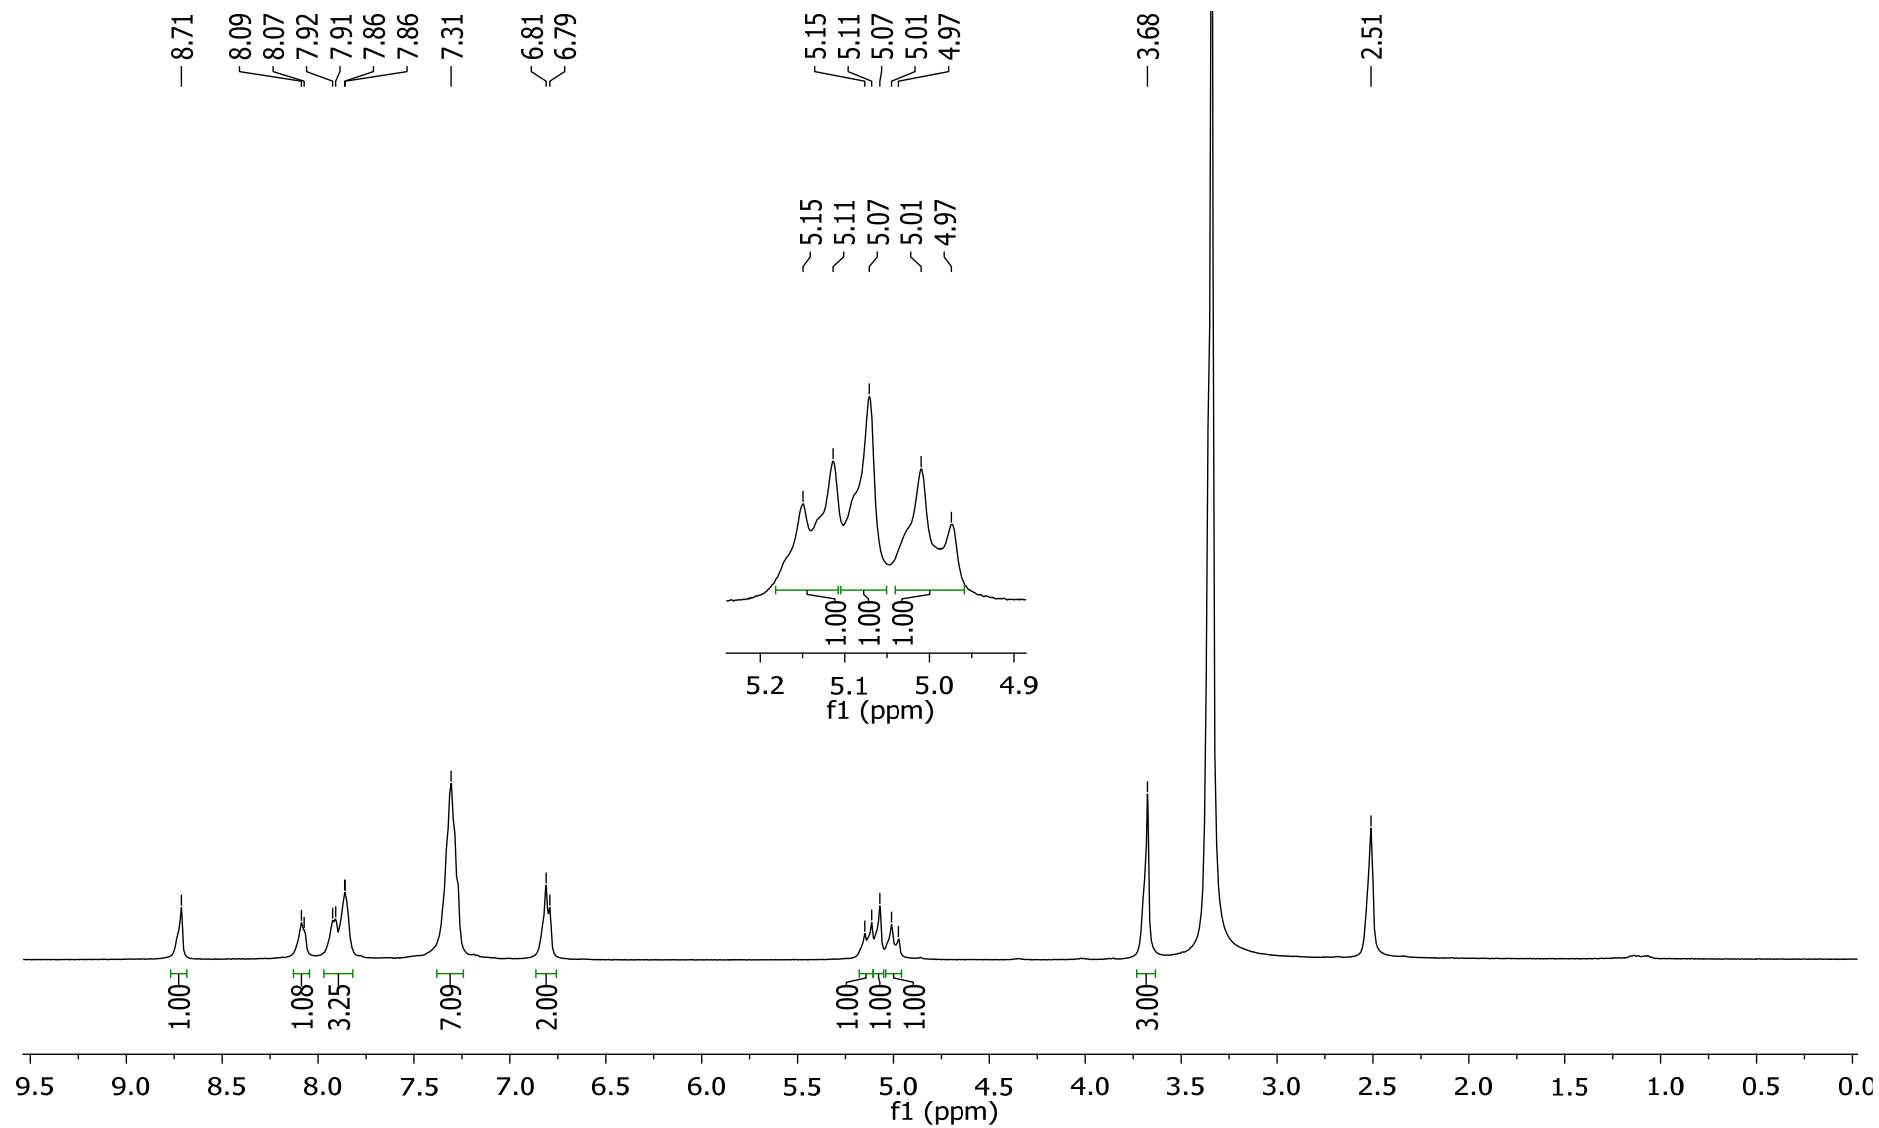

$^1\text{H}$  NMR of compound **3c** (400 MHz,  $\text{DMSO}-d_6$ )

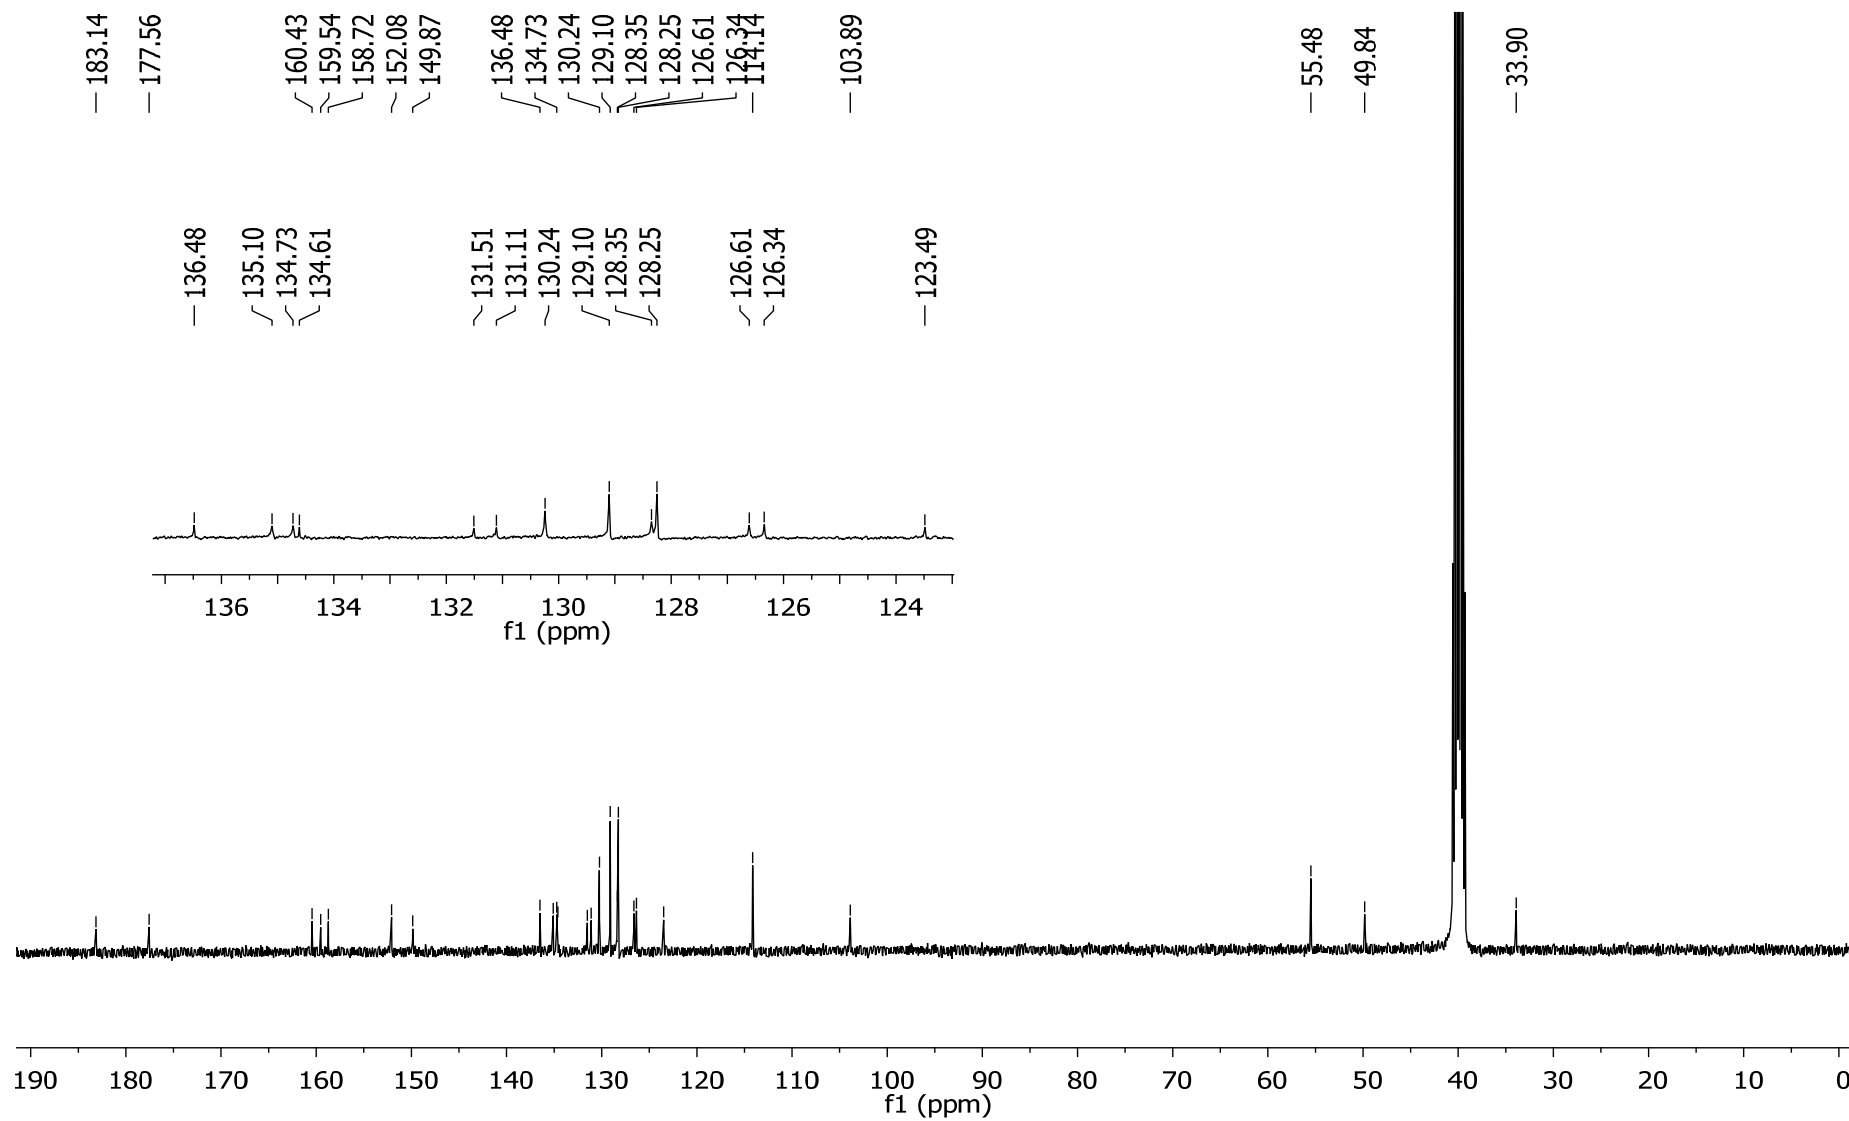

$^{13}\text{C}$  NMR of compound **3c** (100 MHz,  $\text{DMSO}-d_6$ )

EmCh-8-C #89 RT: 0.87 AV: 1 NL: 2.84E8  
T: FTMS + p ESI Full ms [50.0000-750.0000]

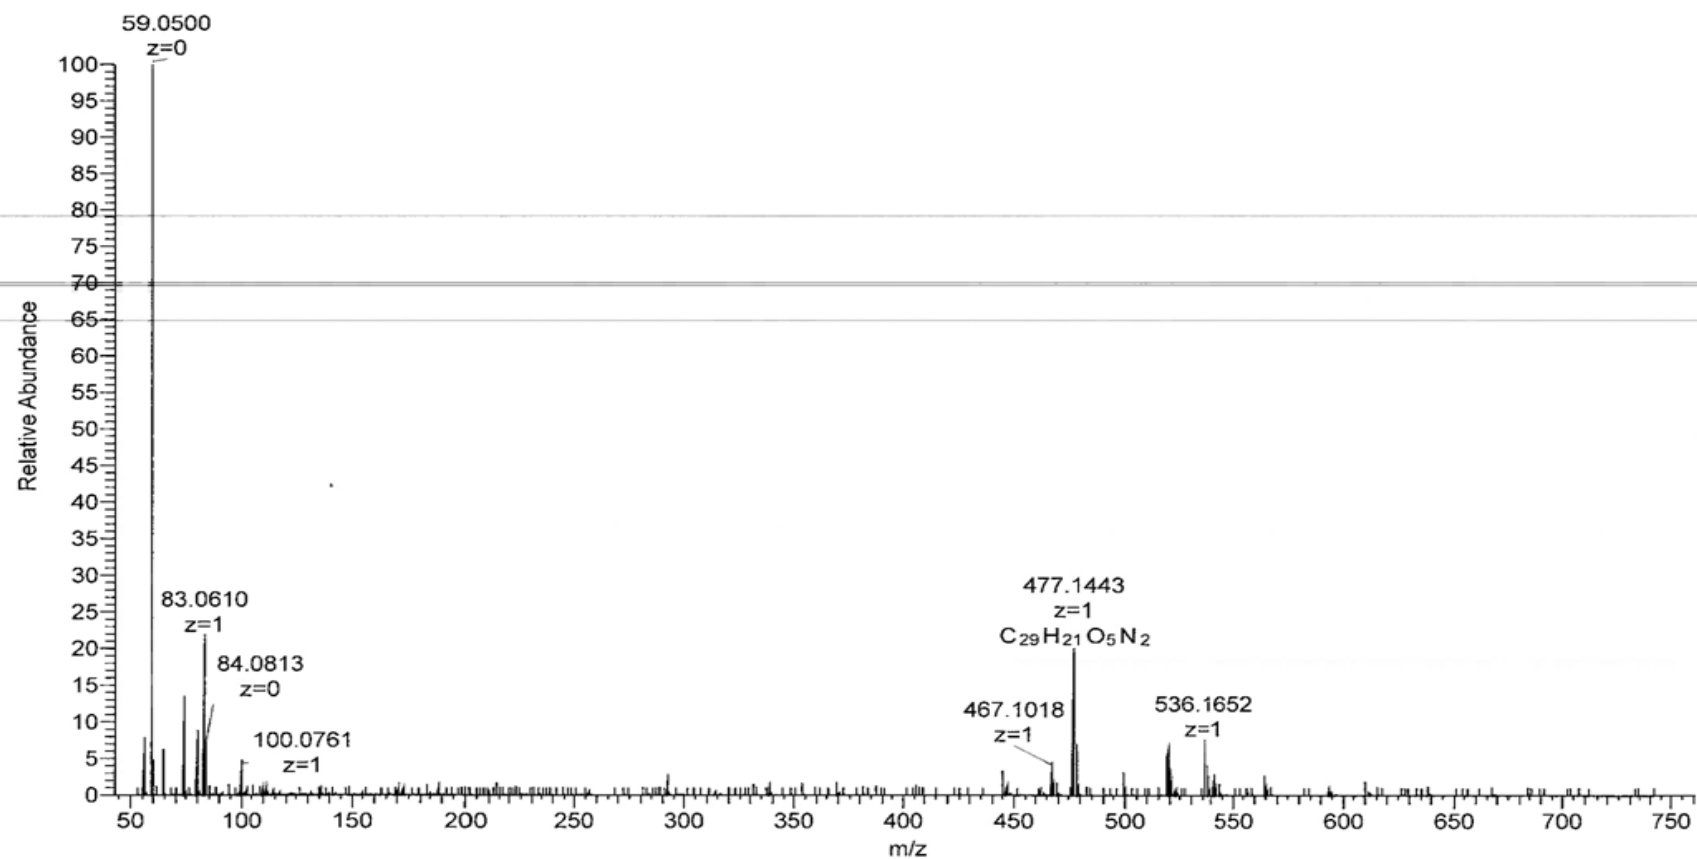

| Peak Mass | Display Formula      | Delta [ppm] | Theo. mass | Combined Score | Pattern Cov. [%] | MSMS Matched Fragments |
|-----------|----------------------|-------------|------------|----------------|------------------|------------------------|
| 477.1443  | $C_{29}H_{21}O_5N_2$ | -0.38       | 477.14450  | 98.57          | 100              | (Collection)           |

HRMS spectrum of compound **3c** (ESI,  $M+H^+$ )

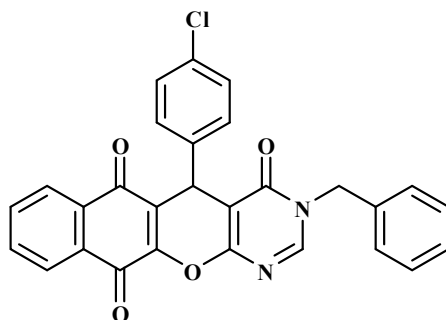

**3-Benzyl-5-(4-chlorophenyl)-3,5-dihydro-4H-benzo[6,7]chromeno[2,3-d]pyrimidine-4,6,11-trione (3d):** It was obtained as a pale yellow solid, yield: 55%, m.p.: > 260 °C.  $^1\text{H}$  NMR (400 MHz, DMSO-*d*6)  $\delta_{\text{H}}$  (ppm): 8.73 (s, 1H,  $\text{CH}_{\text{pyrimidine}}$ ), 8.08 (m, 1H), 7.90-7.86 (m, 3H), 7.42 (d,  $J$ = 6.7 Hz, 2H), 7.31 (m, 7H), 5.14-5.11 (m, 2H,  $\text{CH}_2$ ,  $\text{CH}_{\text{pyran}}$ ), 4.98 (d,  $J$ = 14.6 Hz, 1H,  $\text{CH}_2$ ).  $^{13}\text{C}$  NMR (100 MHz, DMSO-*d*6)  $\delta_{\text{C}}$  (ppm): 183.0, 177.4, 160.4, 159.6, 152.3, 150.2, 141.4, 136.4, 135.0, 134.7, 132.1 (2C), 131.4, 131.1 (2C), 129.0 (2C), 128.6 (2C), 128.3, 128.2 (2C), 126.6, 126.3, 122.6, 103.2, 49.8, 34.5. HRMS (ESI,  $\text{M}+\text{H}^+$ ): calcd for  $\text{C}_{28}\text{H}_{18}^{35}\text{ClN}_2\text{O}_4$ ; 481.0955, found; 481.0948.

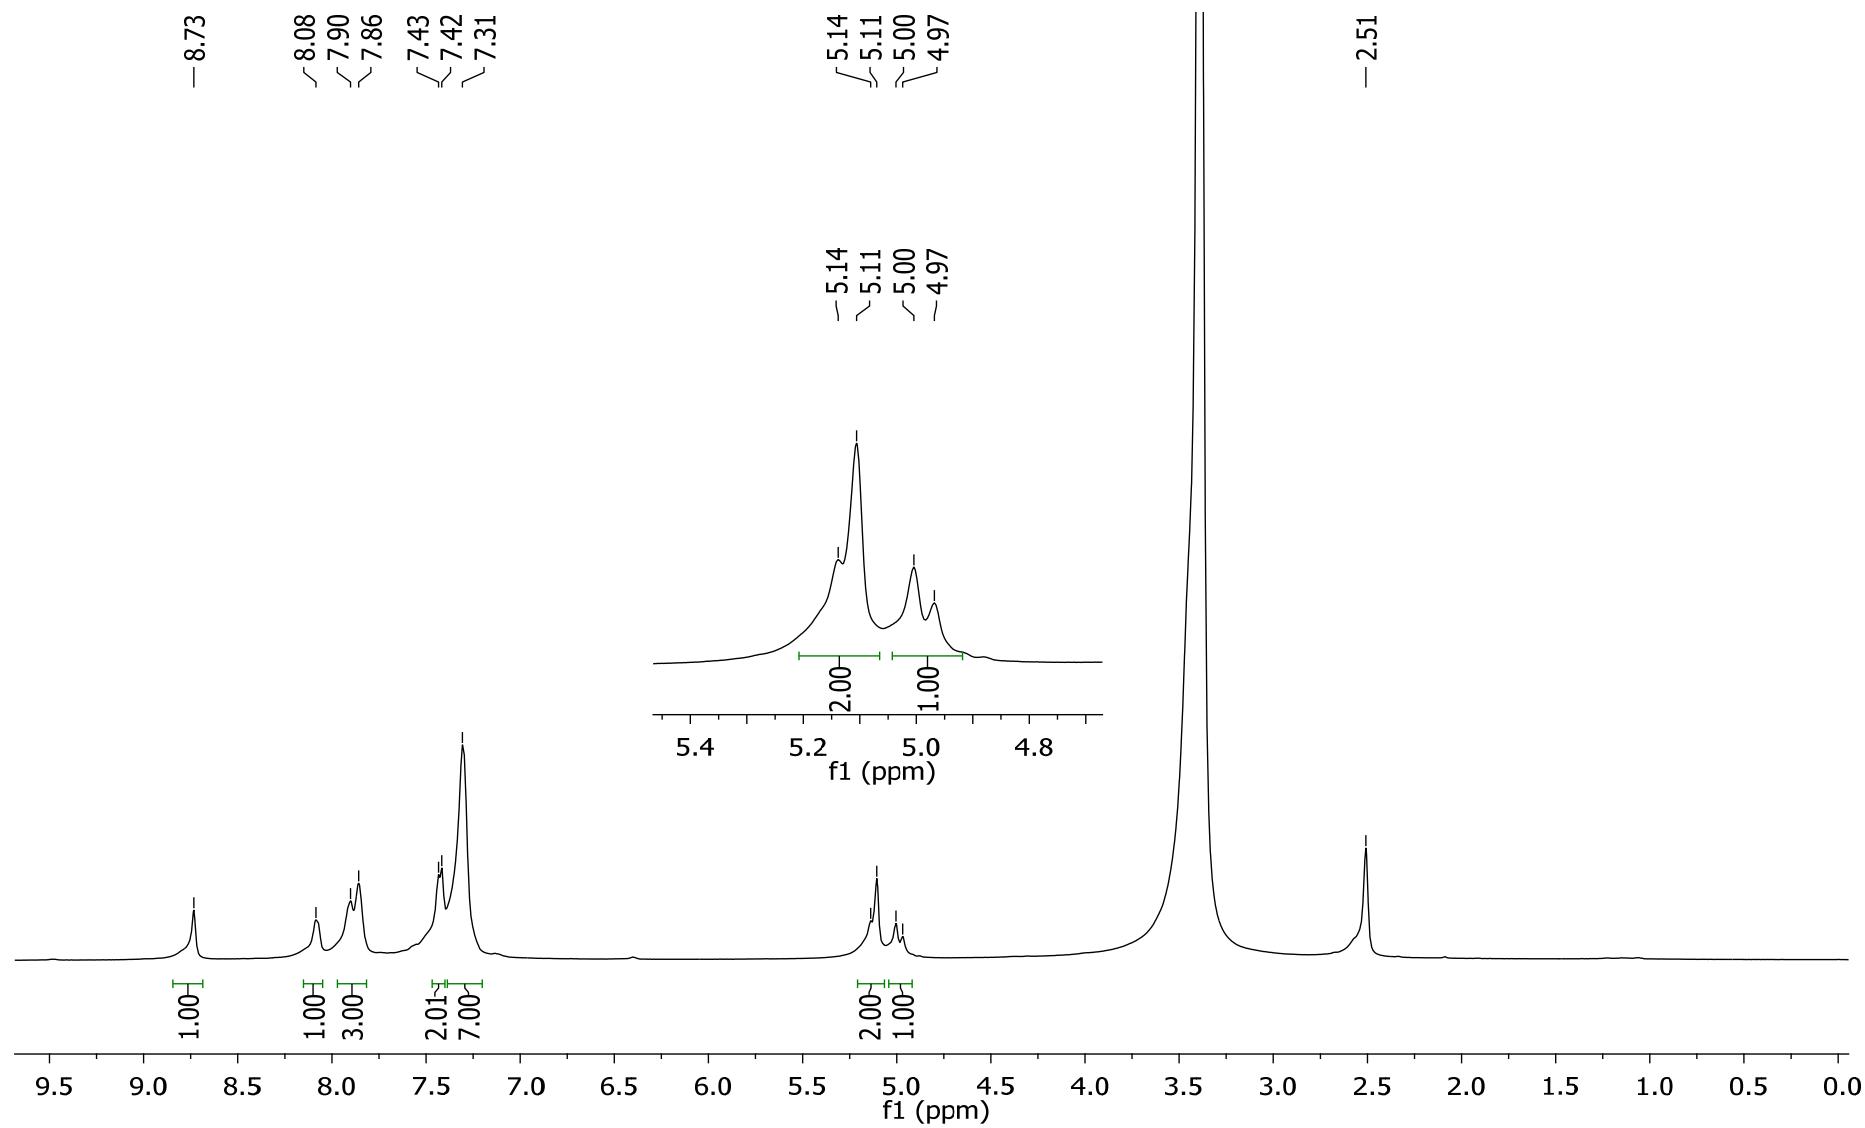

<sup>1</sup>H NMR of compound **3d** (400 MHz, DMSO-*d*<sub>6</sub>)

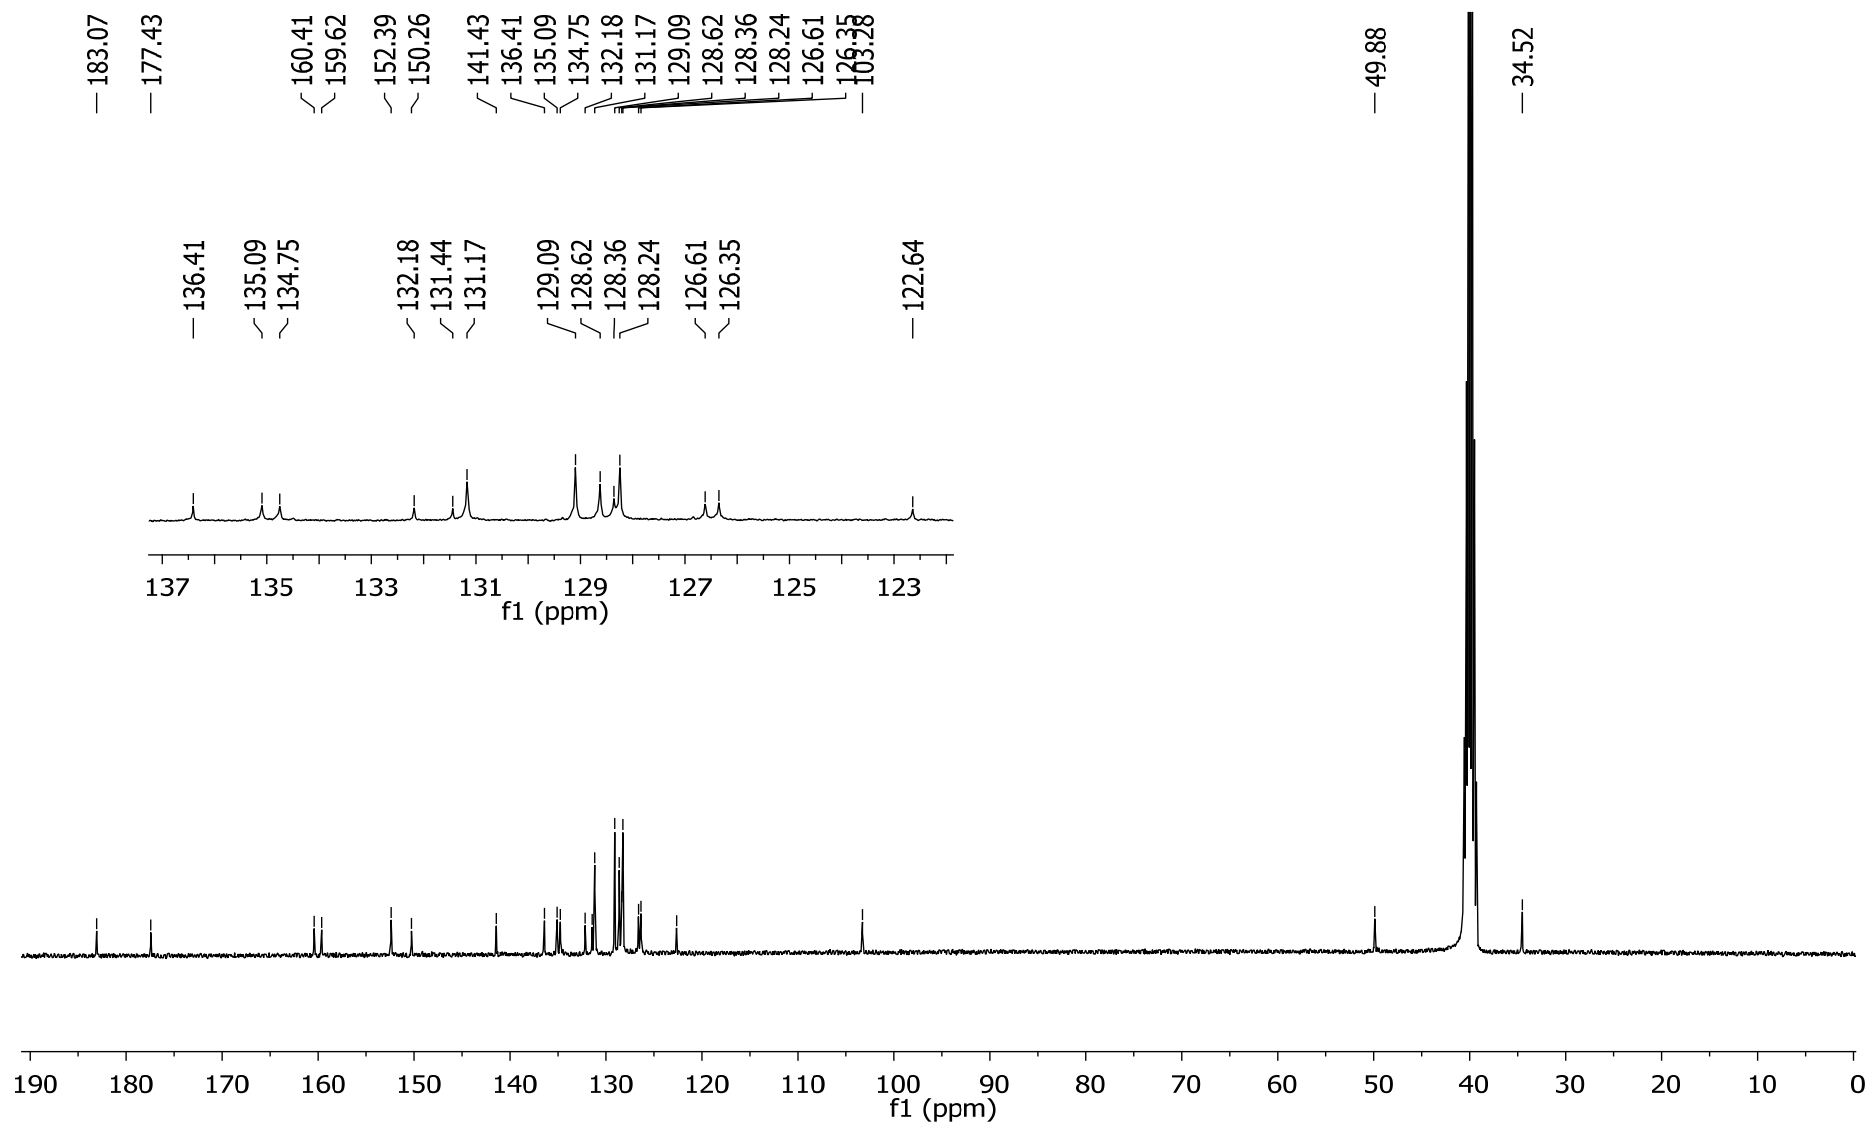

<sup>13</sup>C NMR of compound **3d** (100 MHz, DMSO-*d*<sub>6</sub>)

EmCh-8-D #89 RT: 0.87 AV: 1 NL: 2.18E8  
T: FTMS + p ESI Full ms [50.0000-750.0000]

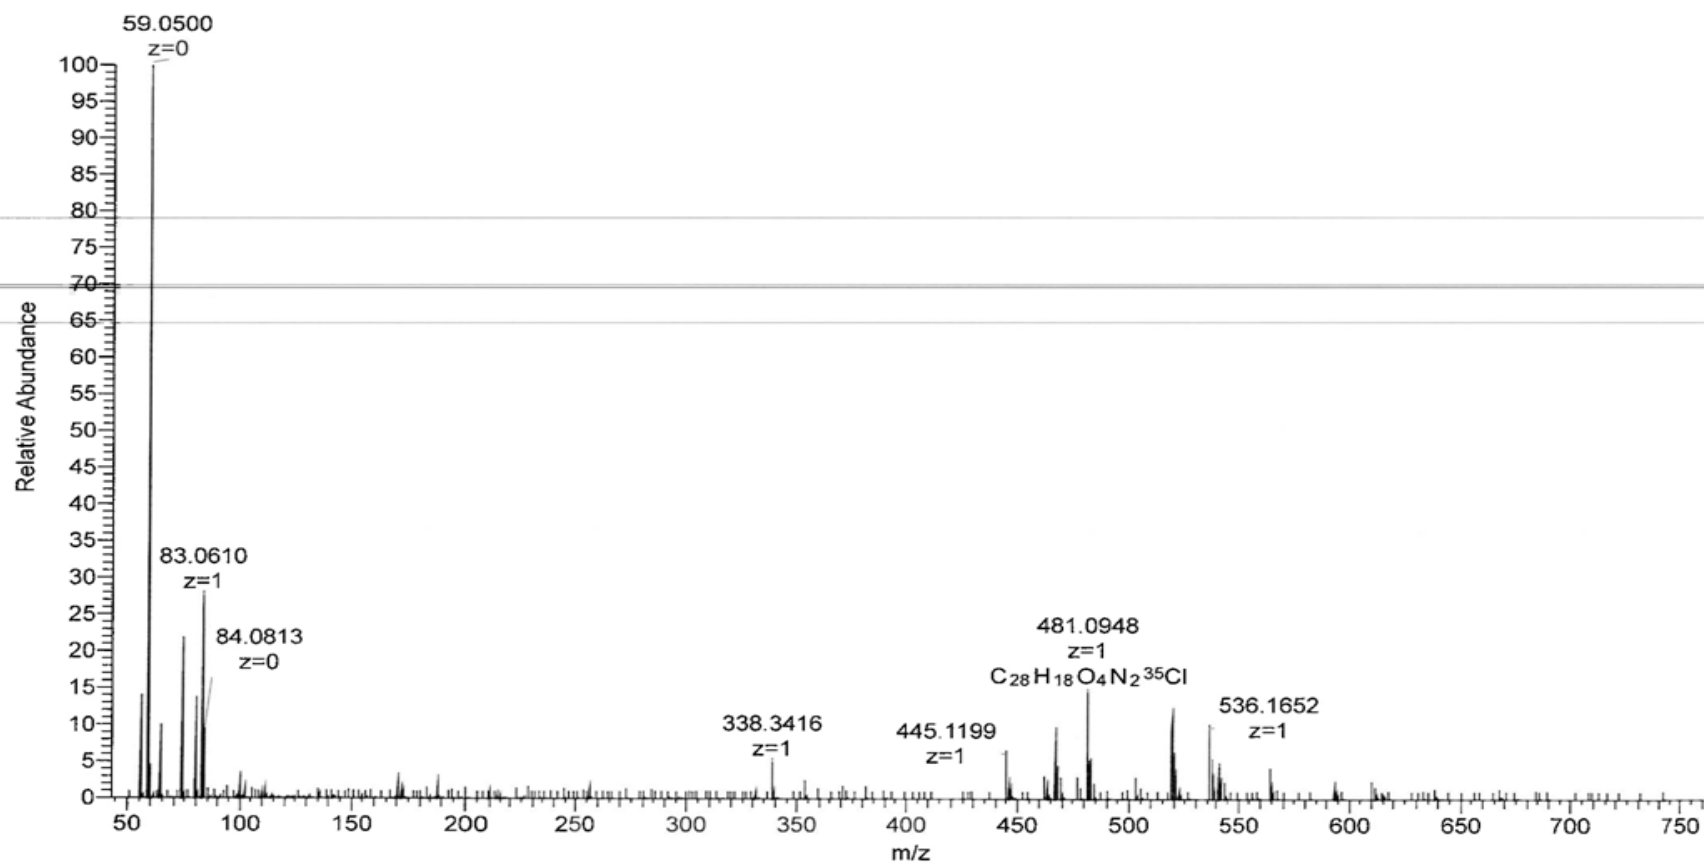

| Peak Mass | Display Formula             | Delta [ppm] | Theo. mass | Combined Score | Pattern Cov. [%] | MSMS Matched Fragments |
|-----------|-----------------------------|-------------|------------|----------------|------------------|------------------------|
| 481.0948  | $C_{28}H_{18}O_4N_2^{35}Cl$ | -0.23       | 481.09496  | 96.88          | 99.88            | (Collection)           |

HRMS spectrum of compound **3d** (ESI,  $M+H^+$ )



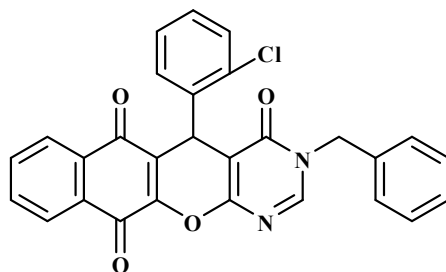

**3-Benzyl-5-(2-chlorophenyl)-3,5-dihydro-4H-benzo[6,7]chromeno[2,3-d]pyrimidine-4,6,11-trione (3e):** It was obtained as a red solid brick, yield: 43%, m.p.: > 260 °C.  $^1\text{H}$  NMR (400 MHz, DMSO-*d*6)  $\delta_{\text{H}}$  (ppm): 8.73 (s, 1H,  $\text{CH}_{\text{pyrimidine}}$ ), 8.08-8.06 (m, 1H), 7.88-7.84 (m, 3H), 7.43-7.41 (m, 2H), 7.34-7.18 (m, 7H), 5.48 (s, 1H,  $\text{CH}_{\text{pyran}}$ ), 5.10 (d,  $J = 14.6$  Hz, 1H,  $\text{CH}_2$ ), 4.95 (d,  $J = 14.6$  Hz, 1H,  $\text{CH}_2$ ).  $^{13}\text{C}$  NMR (100 MHz, DMSO-*d*6)  $\delta_{\text{C}}$  (ppm): 182.9, 177.5, 160.1, 159.8, 152.4, 150.2, 139.8, 136.4, 135.2, 134.7, 133.9, 132.7, 131.4, 130.8, 129.8 (2C), 129.1 (2C), 128.3, 128.0 (2C), 127.6, 126.5, 126.4, 122.5, 102.9, 49.7, 33.5. HRMS (ESI,  $\text{M} + \text{H}^+$ ): calcd for  $\text{C}_{28}\text{H}_{18}^{35}\text{ClN}_2\text{O}_4$ ; 481.0955, found; 481.0948.

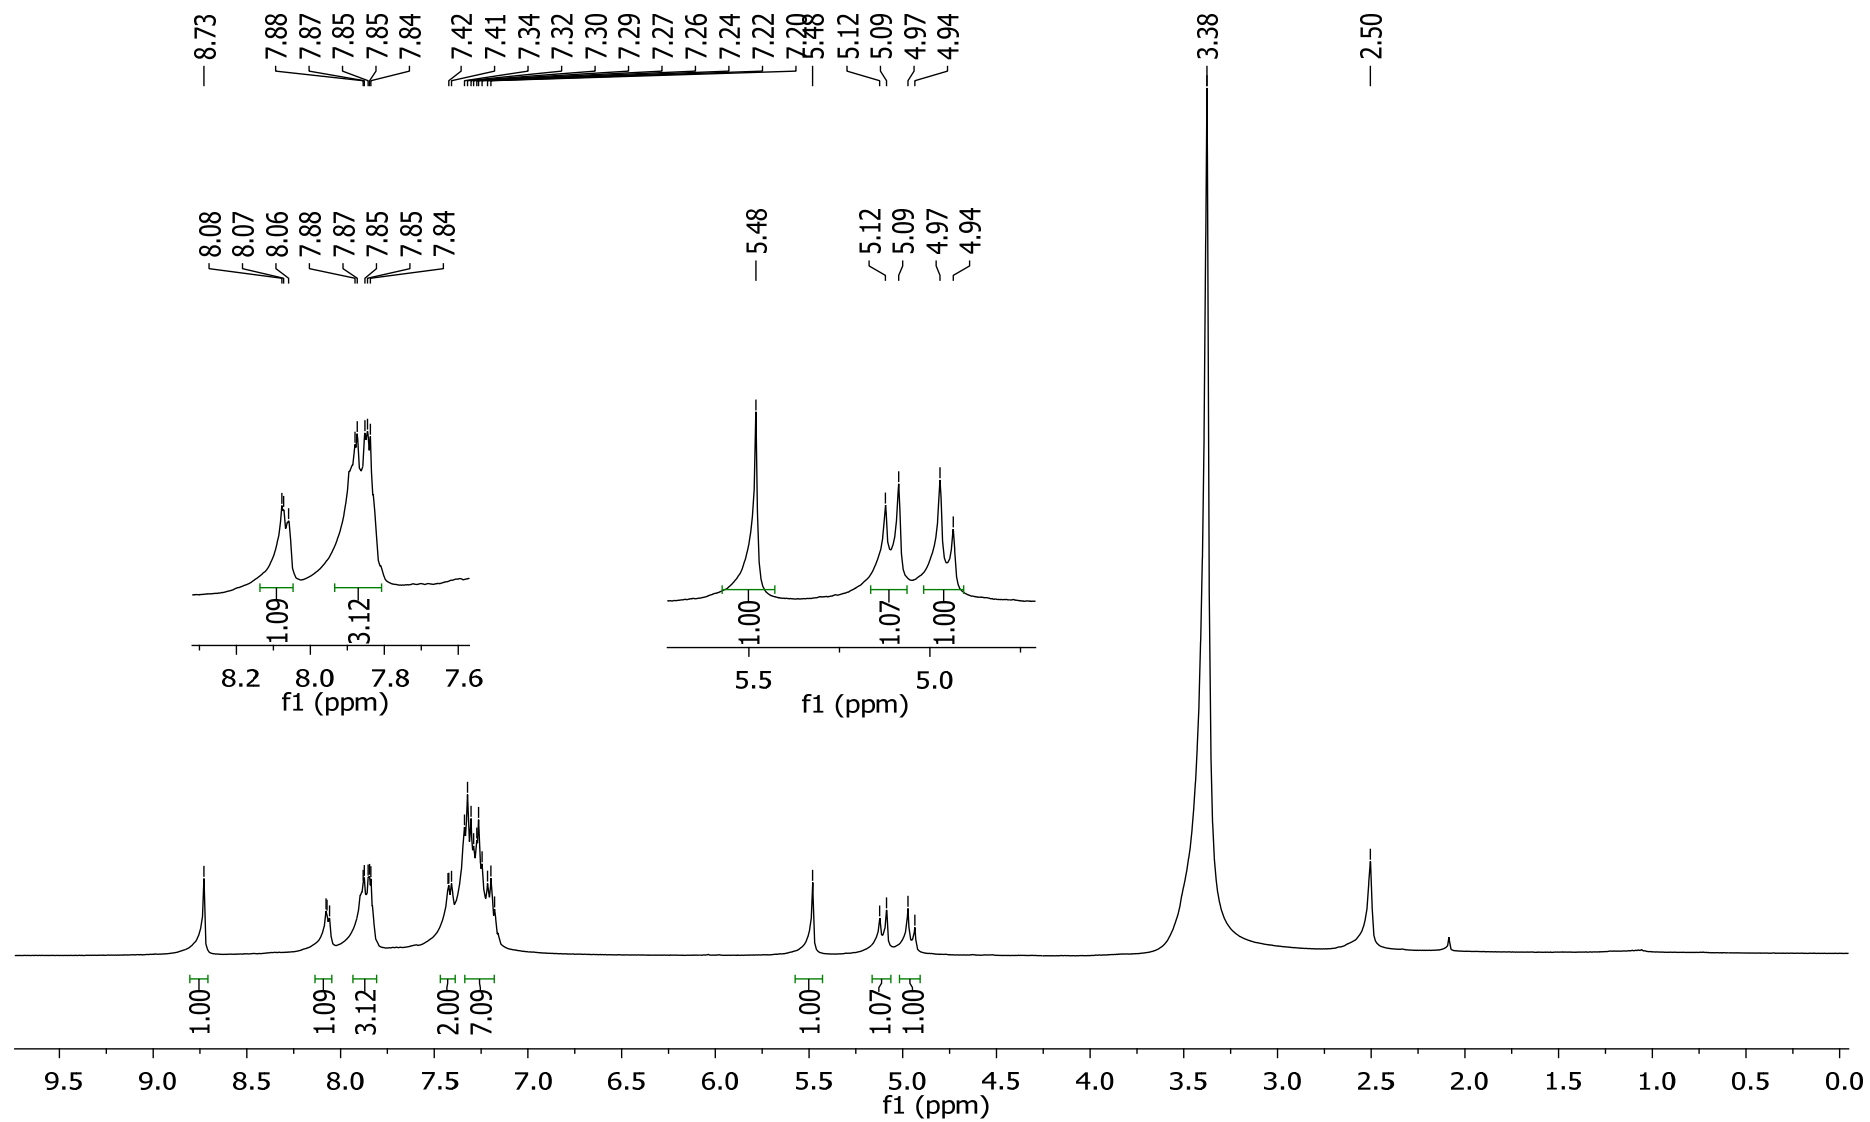

$^1\text{H}$  NMR of compound **3e** (400 MHz,  $\text{DMSO}-d_6$ )

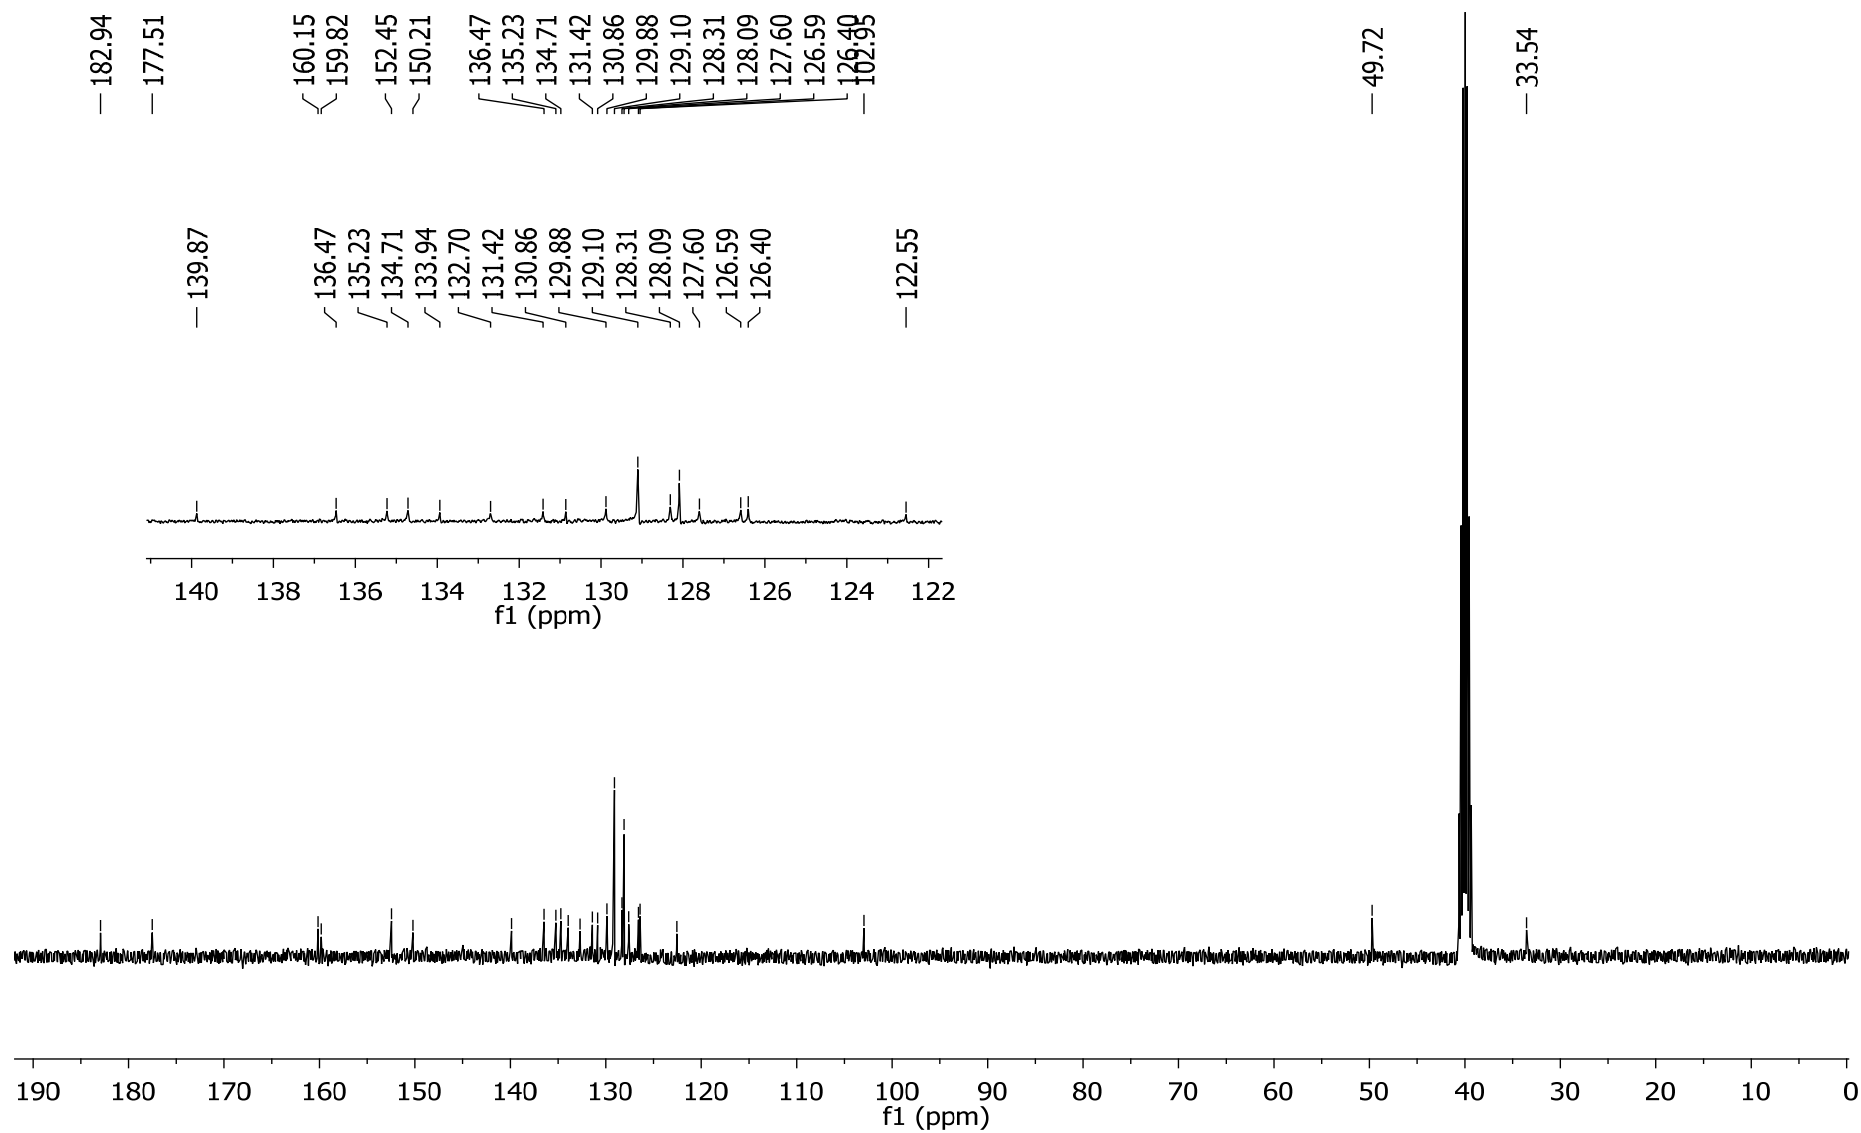

$^{13}\text{C}$  NMR of compound **3e** (100 MHz,  $\text{DMSO}-d_6$ )

EmCh-8-E #87 RT: 0.85 AV: 1 NL: 1.32E8

T: FTMS + p ESI Full ms [50.0000-750.0000]

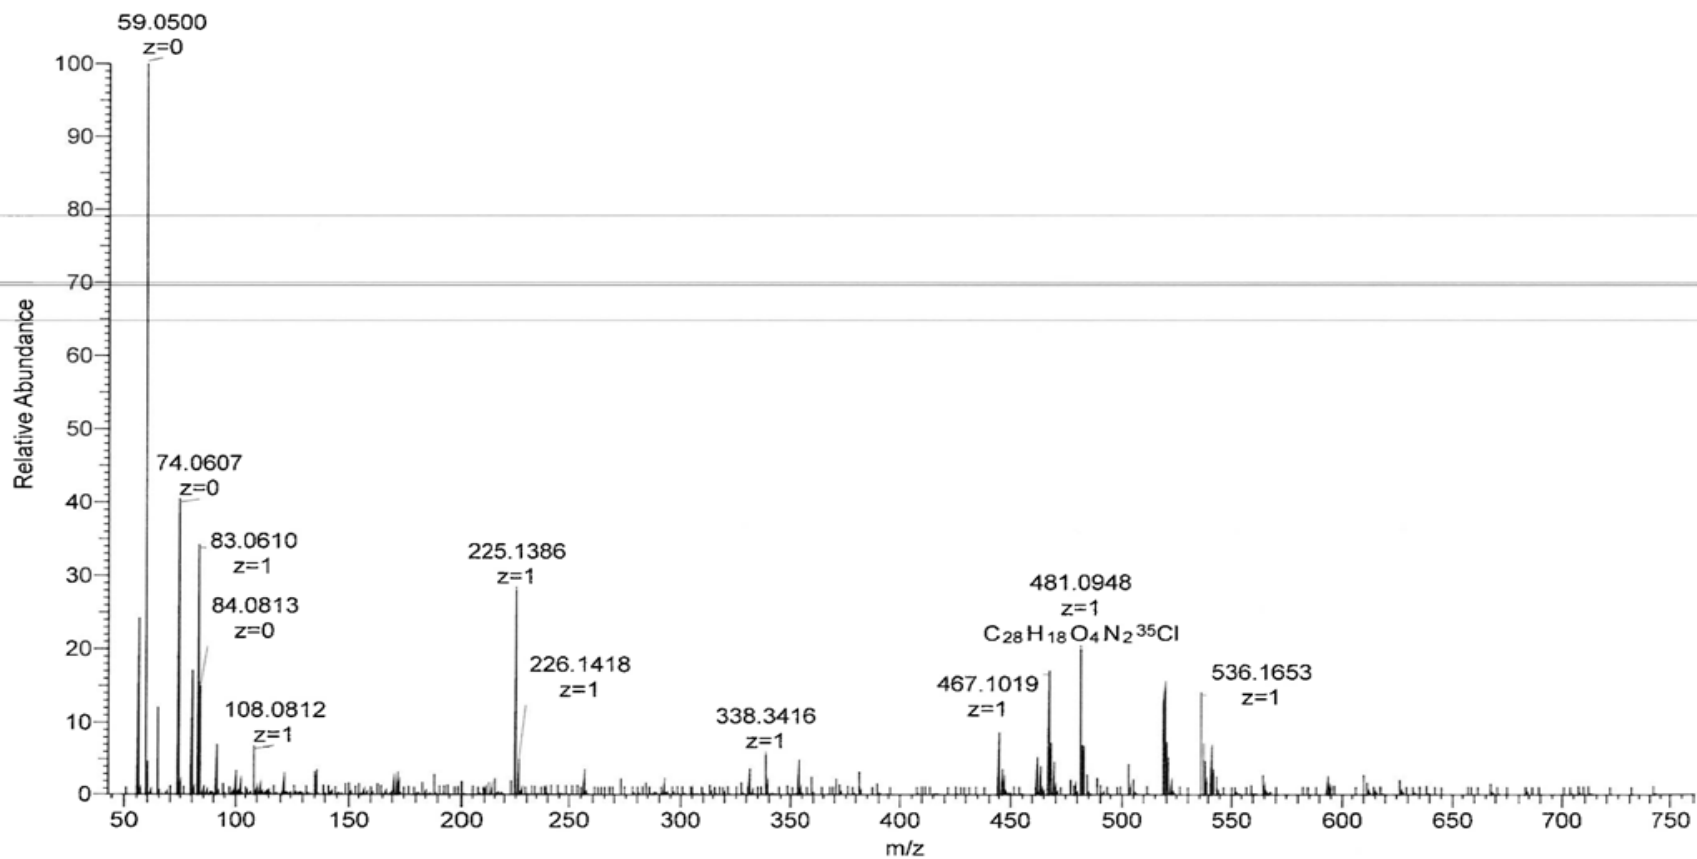

| Peak Mass | Display Formula             | Delta [ppm] | Theo. mass | Combined Score | Pattern Cov. [%] | MSMS Matched Fragments |
|-----------|-----------------------------|-------------|------------|----------------|------------------|------------------------|
| 481.0948  | $C_{28}H_{18}O_4N_2^{35}Cl$ | -0.30       | 481.09496  | 95.22          | 98.92            | (Collection)           |

HRMS spectrum of compound **3e** (ESI,  $M+H^+$ )

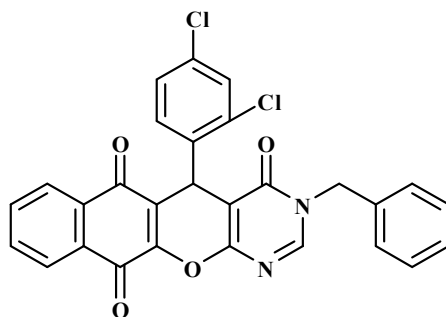

**3-Benzyl-5-(2,4-dichlorophenyl)-3,5-dihydro-4H-benzo[6,7]chromeno[2,3-d]pyrimidine-4,6,11-trione (3f):** It was obtained as an ochre yellow solid, yield: 37%, m.p.: > 260 °C.  $^1\text{H}$  NMR (400 MHz, DMSO-*d*6)  $\delta_{\text{H}}$  (ppm): 8.74 (s, 1H,  $\text{CH}_{\text{pyrimidine}}$ ), 8.08-8.06 (m, 1H), 7.88-7.85 (m, 3H), 7.49-7.44 (m, 2H), 7.33-7.25 (m, 6H), 5.46 (s, 1H,  $\text{CH}_{\text{pyran}}$ ), 5.11 (d,  $J = 14.7$  Hz, 1H,  $\text{CH}_2$ ), 4.96 (d,  $J = 14.7$  Hz, 1H,  $\text{CH}_2$ ).  $^{13}\text{C}$  NMR (100 MHz, DMSO-*d*6)  $\delta_{\text{C}}$  (ppm): 183.0, 177.4, 160.1, 159.7, 152.4, 150.2, 139.1, 136.2, 135.3, 134.9, 134.8, 133.7, 132.7, 131.3, 130.7, 129.1 (2C), 129.0, 128.3, 128.0 (2C), 127.7, 126.6, 126.4, 122.0, 102.6, 49.7, 33.1. HRMS (ESI,  $\text{M} + \text{H}^+$ ): calcd for  $\text{C}_{28}\text{H}_{17}^{35}\text{Cl}_2\text{N}_2\text{O}_4$ ; 515.0565, found; 515.0559.

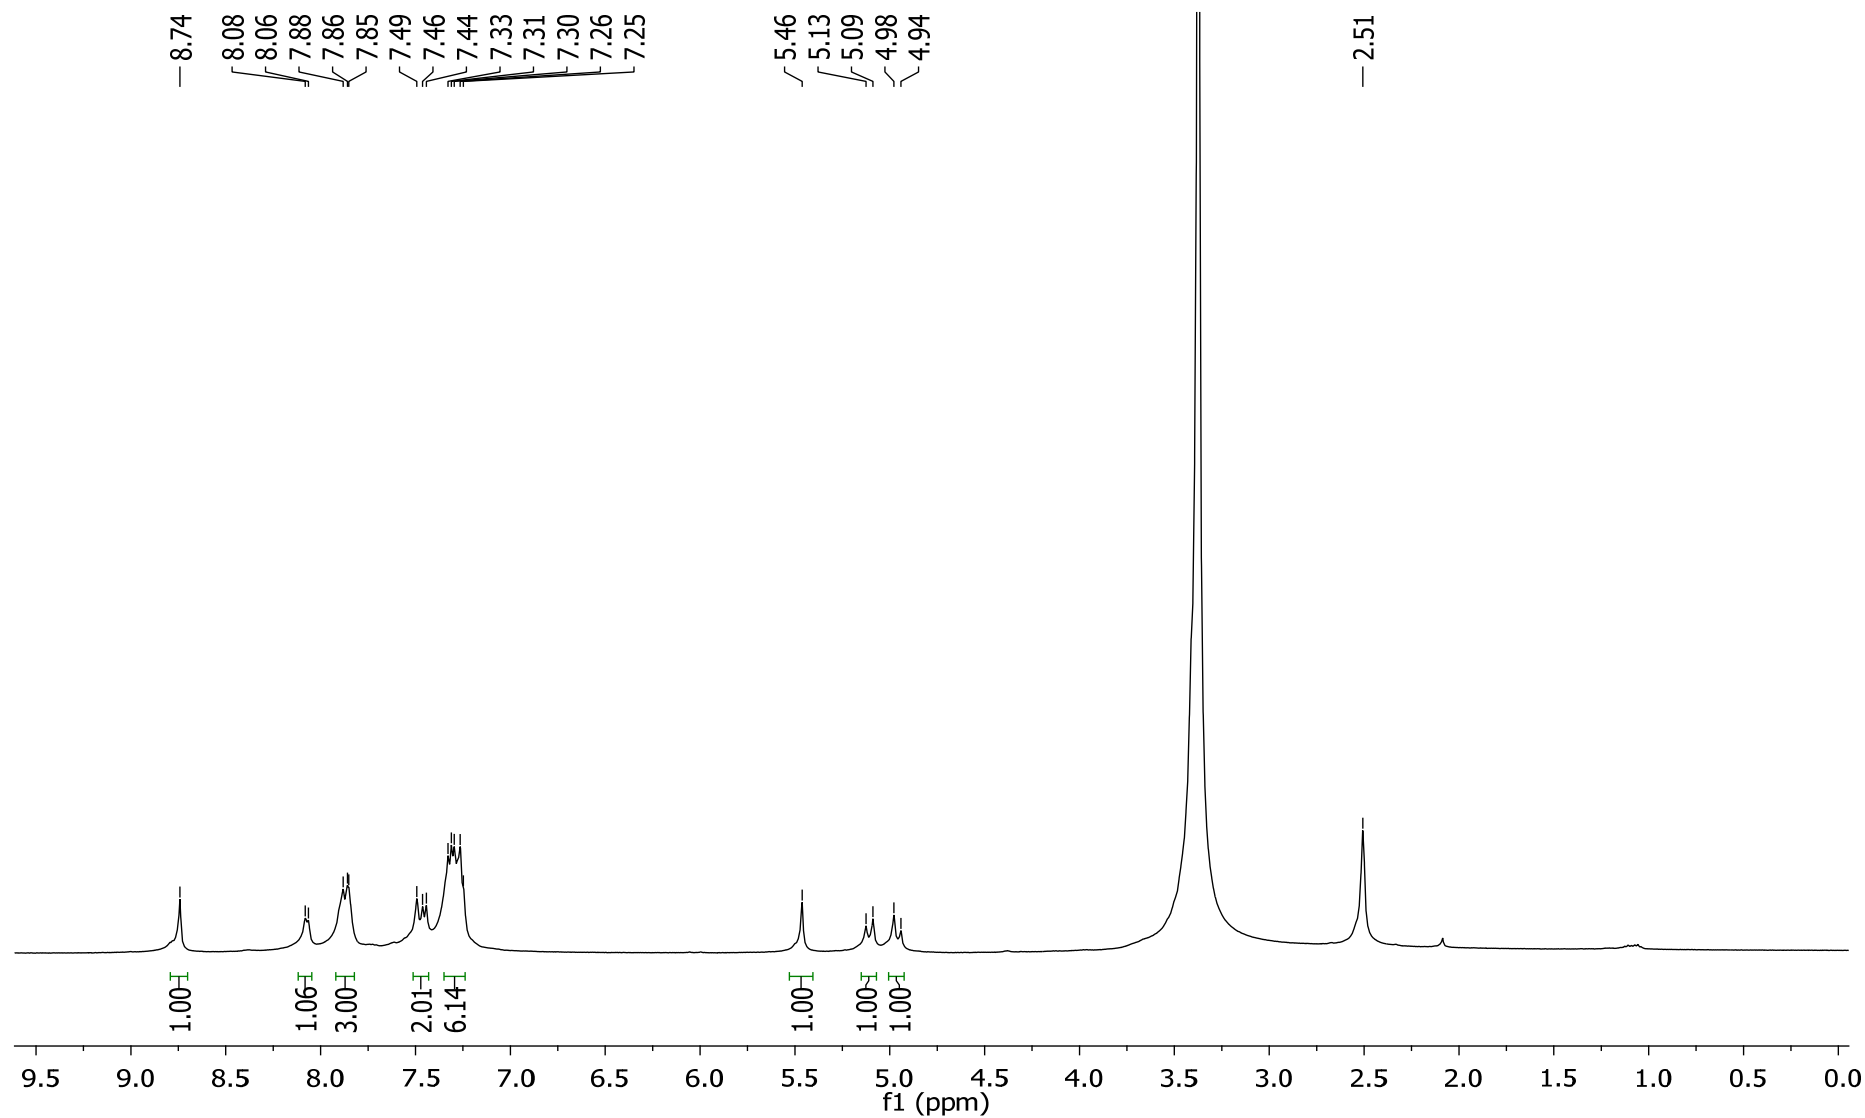

<sup>1</sup>H NMR of compound **3f** (400 MHz, DMSO-*d*<sub>6</sub>)

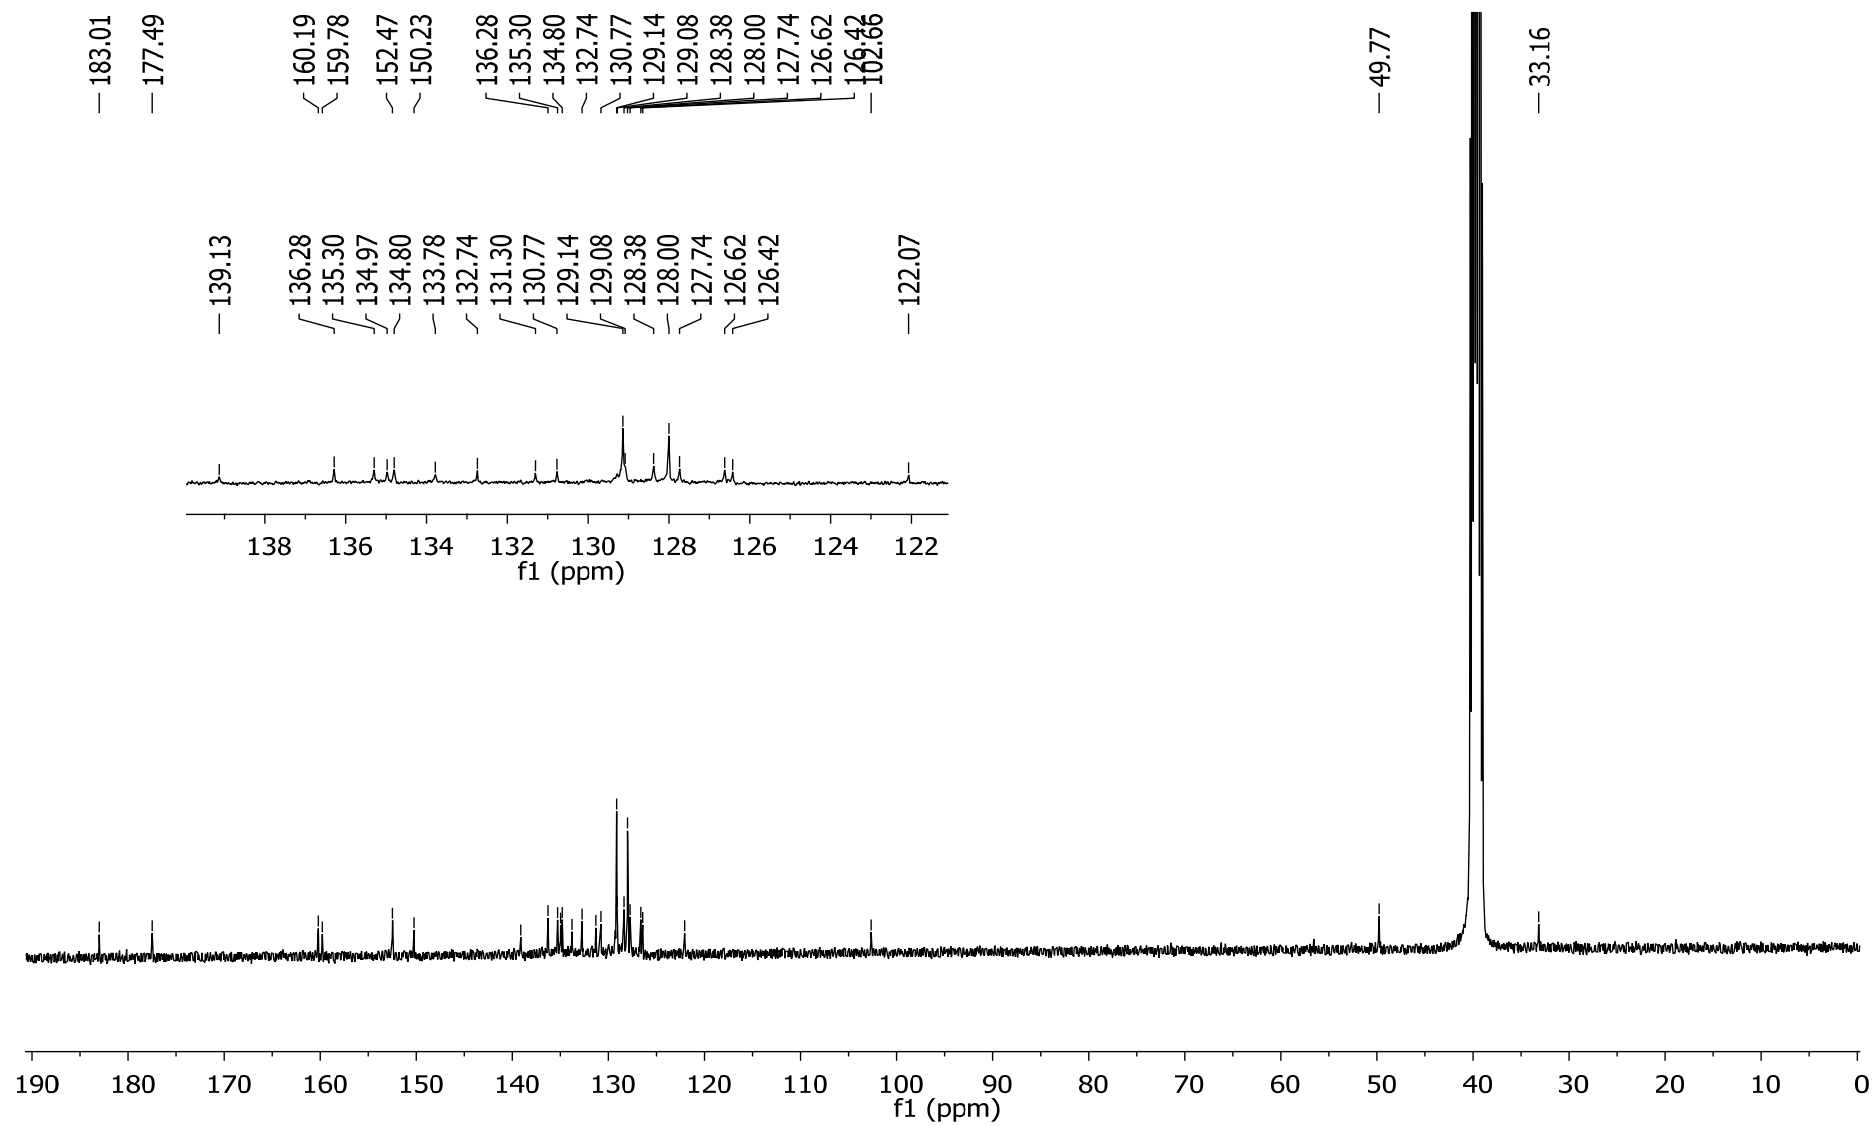

$^{13}\text{C}$  NMR of compound **3f** (100 MHz,  $\text{DMSO}-d_6$ )

EmCh-8-F #85 RT: 0.83 AV: 1 NL: 6.01E7  
T: FTMS + p ESI Full ms [50.0000-750.0000]

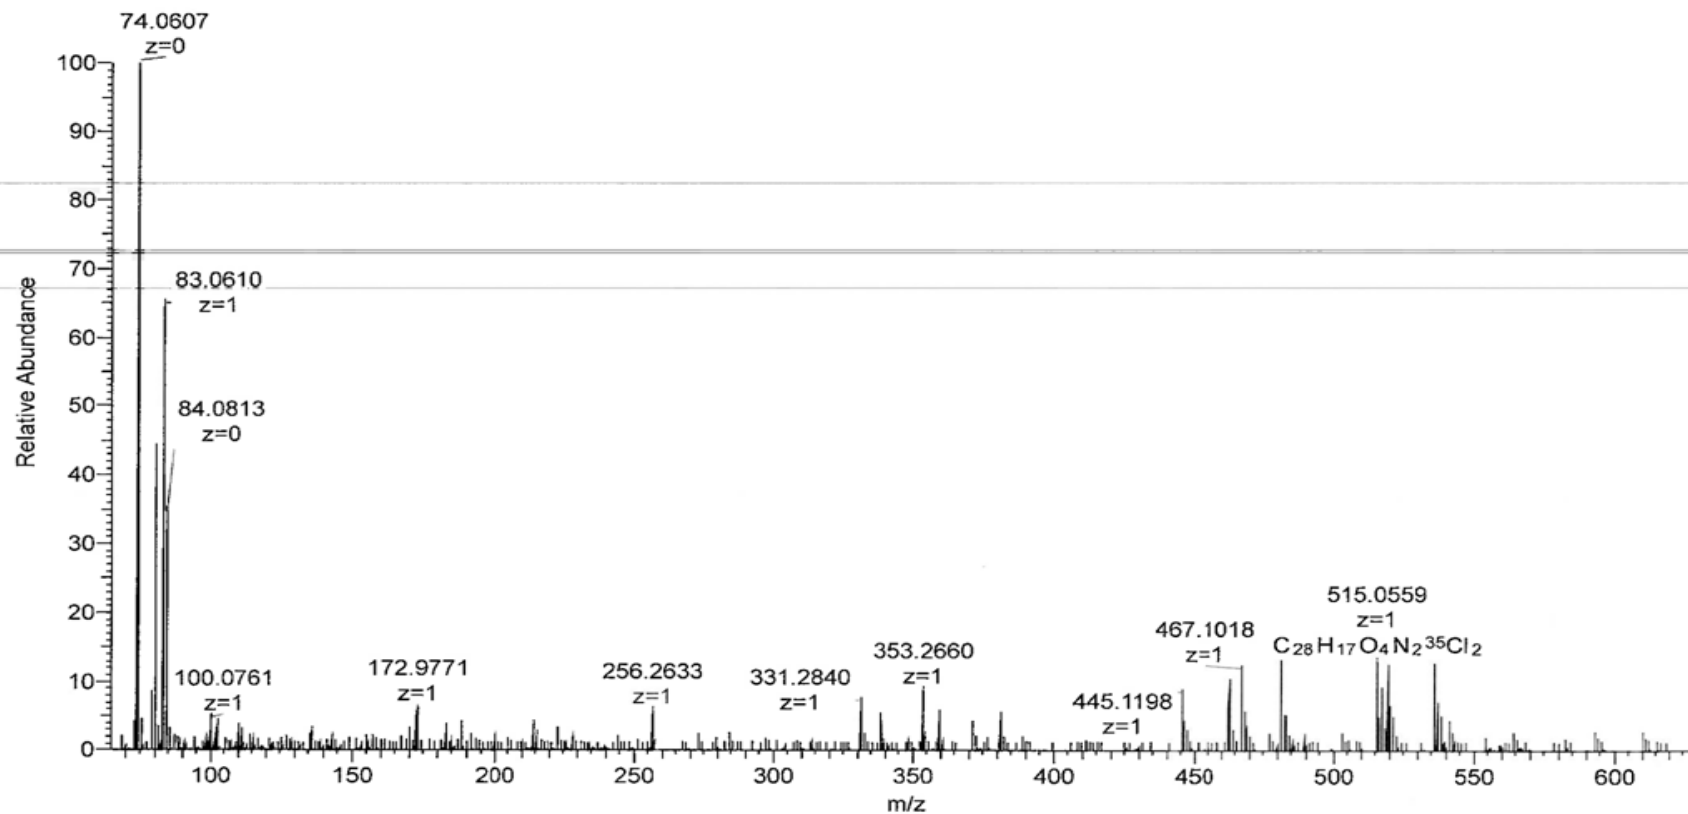

| Peak Mass | Display Formula               | Delta [ppm] | Theo. mass | Combined Score | Pattern Cov. [%] | MSMS Matched Fragments (Collection) |
|-----------|-------------------------------|-------------|------------|----------------|------------------|-------------------------------------|
| 515.0559  | $C_{28}H_{17}O_4N_2^{35}Cl_2$ | -0.16       | 515.05599  | 62.25          | 99.77            |                                     |

HRMS spectrum of compound **3f** (ESI,  $M+H^+$ )



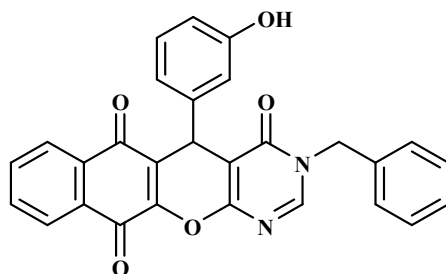

**3-Benzyl-5-(3-hydroxyphenyl)-3,5-dihydro-4H-benzo[6,7]chromeno[2,3-d]pyrimidine-4,6,11-trione (3g):** It was obtained as a red solid brick, yield: 57%, m.p.: 200-220 °C.  $^1\text{H}$  NMR (400 MHz, DMSO-*d*6)  $\delta_{\text{H}}$  (ppm): 9.37 (s, 1H, OH), 8.74 (s, 1H,  $\text{CH}_{\text{pyrimidine}}$ ), 8.07 (m, 1H), 7.93-7.85 (m, 3H), 7.34-7.31 (m, 5H), 7.05-7.02 (m, 1H), 6.80-6.76 (m, 2H), 6.56 (d,  $J$ = 7.9 Hz, 1H), 5.15 (d,  $J$ = 14.6 Hz, 1H,  $\text{CH}_2$ ), 5.04 (s, 1H,  $\text{CH}_{\text{pyran}}$ ), 5.00 (d,  $J$ = 14.6 Hz, 1H,  $\text{CH}_2$ ).  $^{13}\text{C}$  NMR (100 MHz, DMSO-*d*6)  $\delta_{\text{C}}$  (ppm): 183.0, 177.5, 160.4, 159.7, 157.6, 152.1, 149.9, 143.6, 136.4, 135.1, 134.7, 131.4, 131.0, 129.7, 129.1 (2C), 128.3, 128.2 (2C), 126.6, 126.4, 123.5, 119.7, 116.1, 114.6, 103.7, 49.8, 34.5. HRMS (ESI,  $\text{M}+\text{H}^+$ ): calcd for  $\text{C}_{28}\text{H}_{19}\text{N}_2\text{O}_5$ ; 463.1294, found; 463.1286.



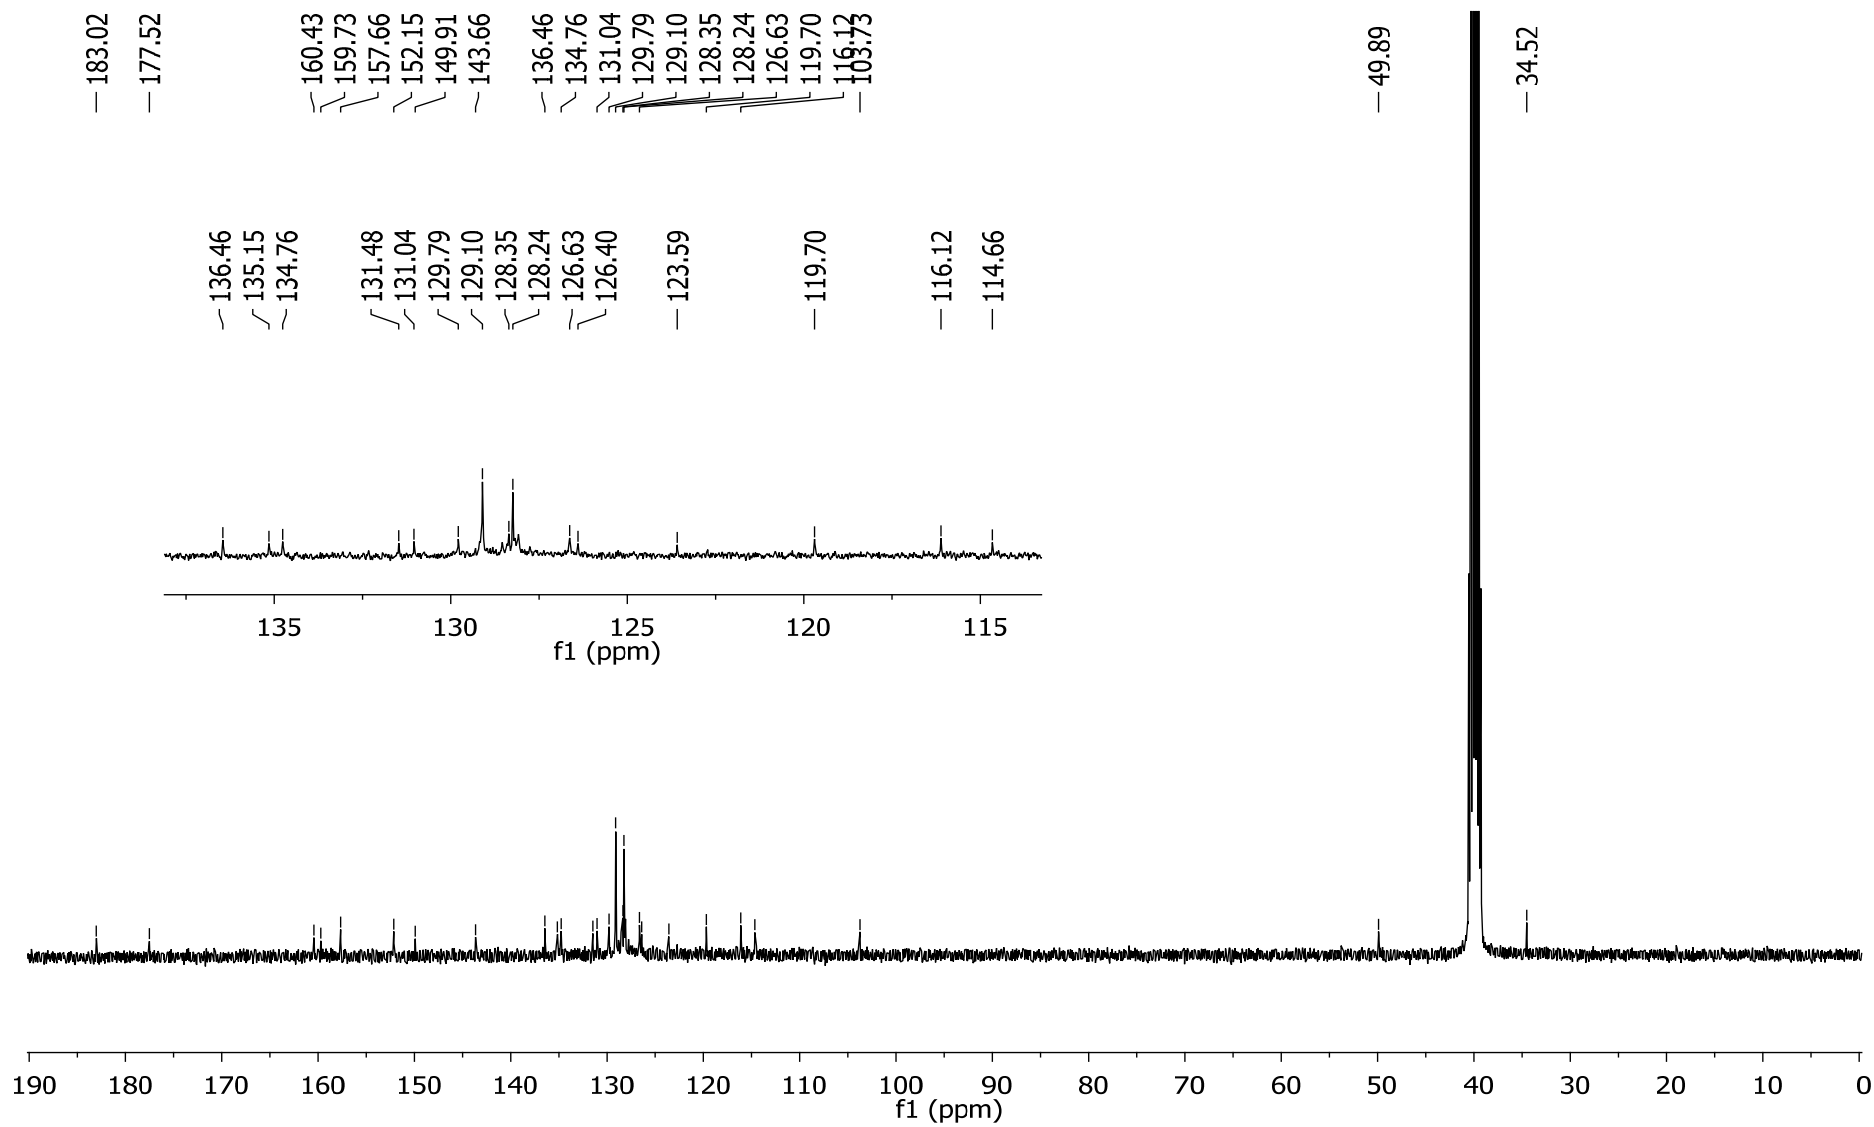

$^{13}\text{C}$  NMR of compound **3g** (100 MHz,  $\text{DMSO}-d_6$ )

EmCh-8-G #91 RT: 0.89 AV: 1 NL: 7.63E8  
T: FTMS + p ESI Full ms [50.0000-750.0000]

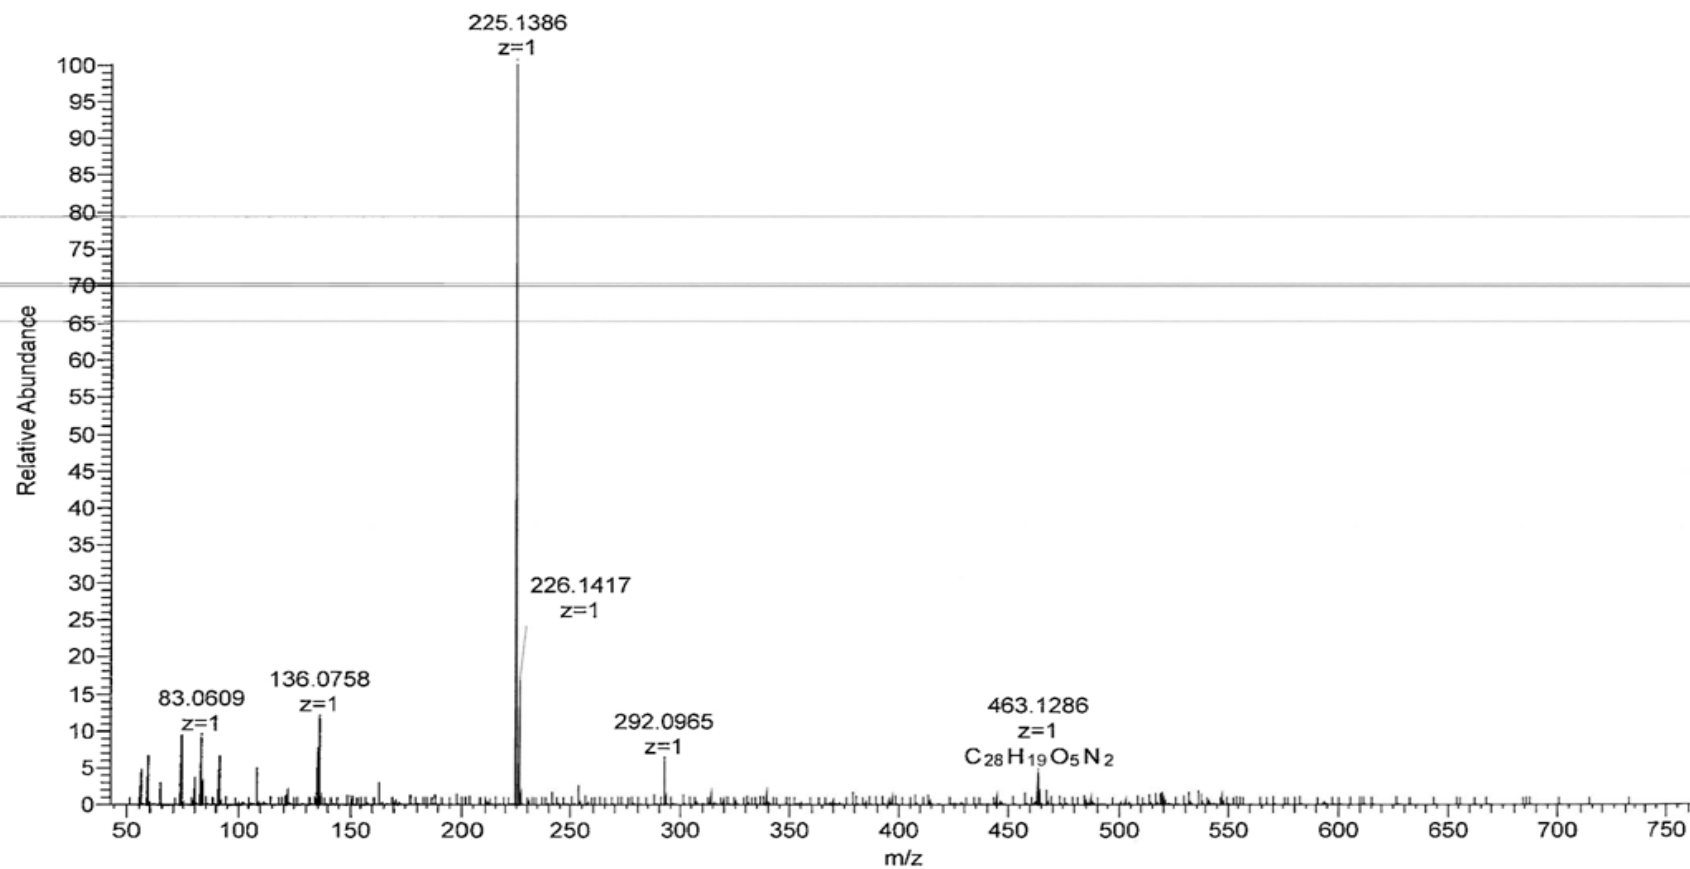

| Peak Mass | Display Formula      | Delta [ppm] | Theo. mass<br>(Collection) | Combined Score | Pattern Cov. [%] | MSMS Matched Fragments |
|-----------|----------------------|-------------|----------------------------|----------------|------------------|------------------------|
| 463.1286  | $C_{28}H_{19}O_5N_2$ | -0.47       | 463.12885                  | 93.06          | 95.51            |                        |

HRMS spectrum of compound **3g** (ESI,  $M+H^+$ )

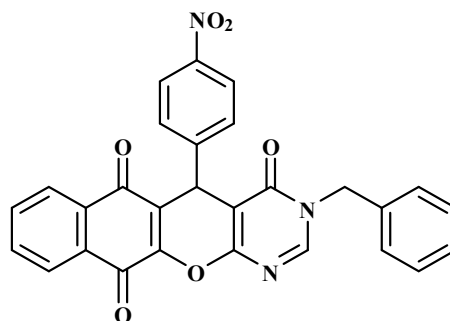

**3-Benzyl-5-(4-nitrophenyl)-3,5-dihydro-4H-benzo[6,7]chromeno[2,3-d]pyrimidine-4,6,11-trione (3h):** It was obtained as an ochre yellow solid, yield: 50%, m.p.: > 260 °C.  $^1\text{H}$  NMR (400 MHz, DMSO-*d*6)  $\delta_{\text{H}}$  (ppm): 8.73 (s, 1H,  $\text{CH}_{\text{pyrimidine}}$ ), 8.10-8.08 (m, 3H), 7.87-7.81 (m, 3H), 7.70 (d,  $J$ = 8.5 Hz, 2H), 7.32-7.27 (m, 5H), 5.21 (s, 1H,  $\text{CH}_{\text{pyran}}$ ), 5.09 (d,  $J$ = 14.7 Hz, 1H,  $\text{CH}_2$ ), 5.47 (d,  $J$ = 14.7 Hz, 1H,  $\text{CH}_2$ ).  $^{13}\text{C}$  NMR (100 MHz, DMSO-*d*6)  $\delta_{\text{C}}$  (ppm): 183.0, 177.3, 160.4, 159.7, 152.6, 150.4, 149.7, 146.9, 136.2, 135.1, 134.8, 131.3, 131.0, 130.8 (2C), 129.1 (2C), 128.4, 128.2 (2C), 126.6, 126.3, 123.7 (2C), 122.0, 102.6, 49.9, 35.3. HRMS (ESI,  $\text{M}+\text{H}^+$ ): calcd for  $\text{C}_{28}\text{H}_{18}\text{N}_3\text{O}_6$ ; 492.1196, found; 492.1192.

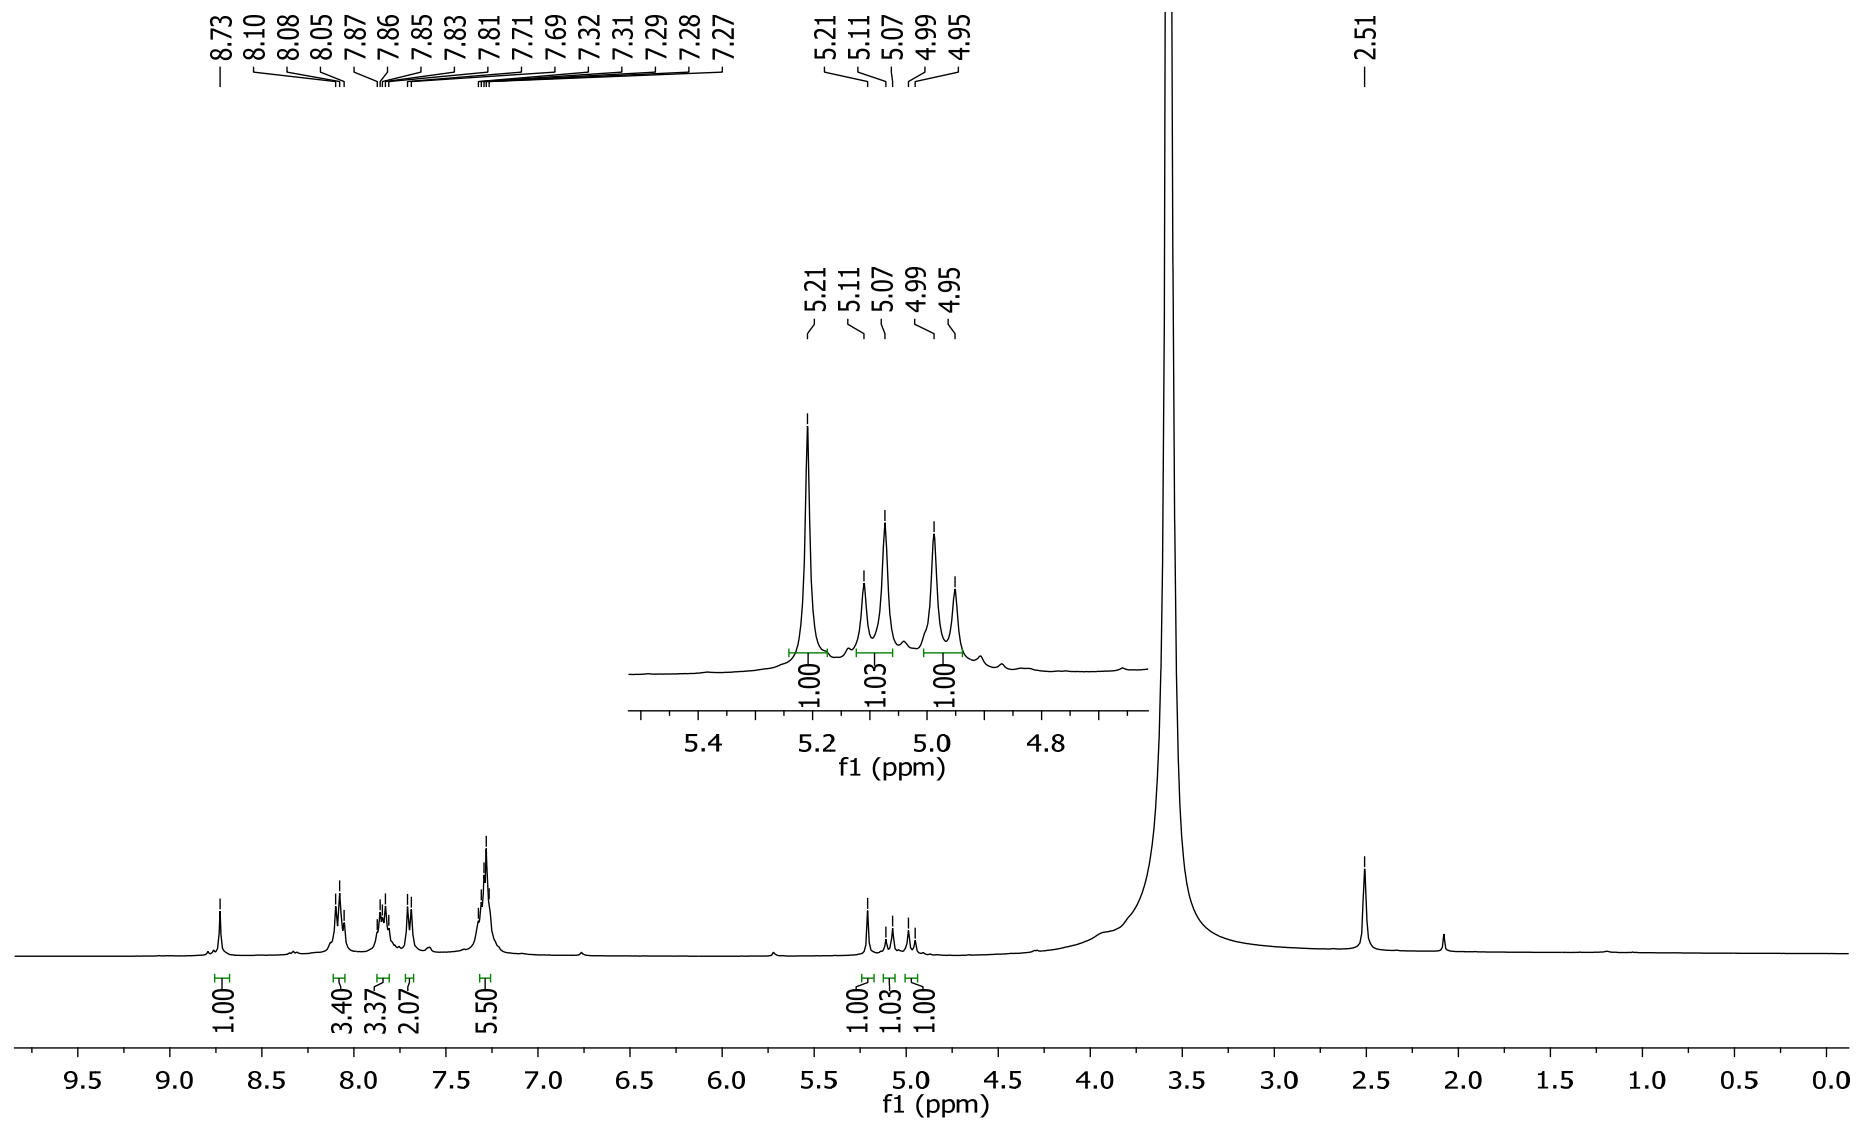

<sup>1</sup>H NMR of compound **3h** (400 MHz, DMSO-*d*<sub>6</sub>)

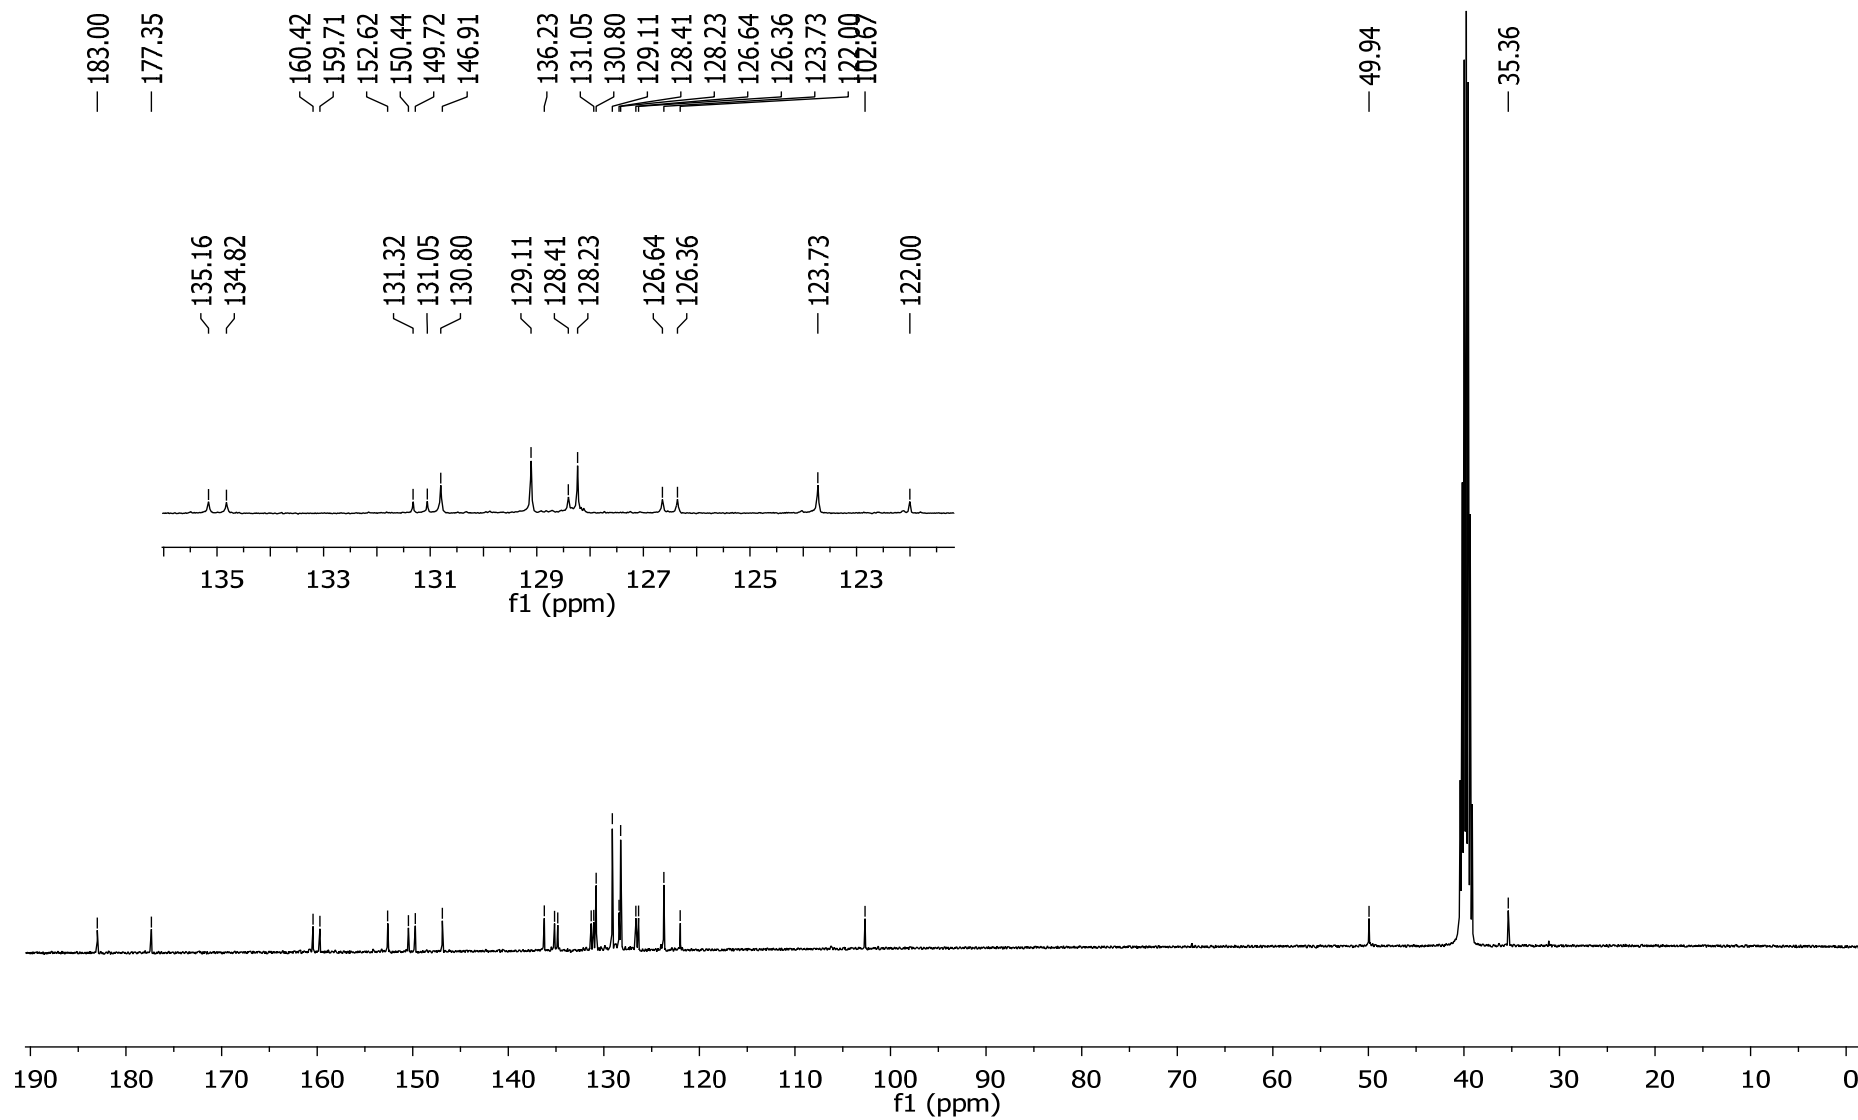

<sup>13</sup>C NMR of compound **3h** (100 MHz, DMSO-*d*<sub>6</sub>)

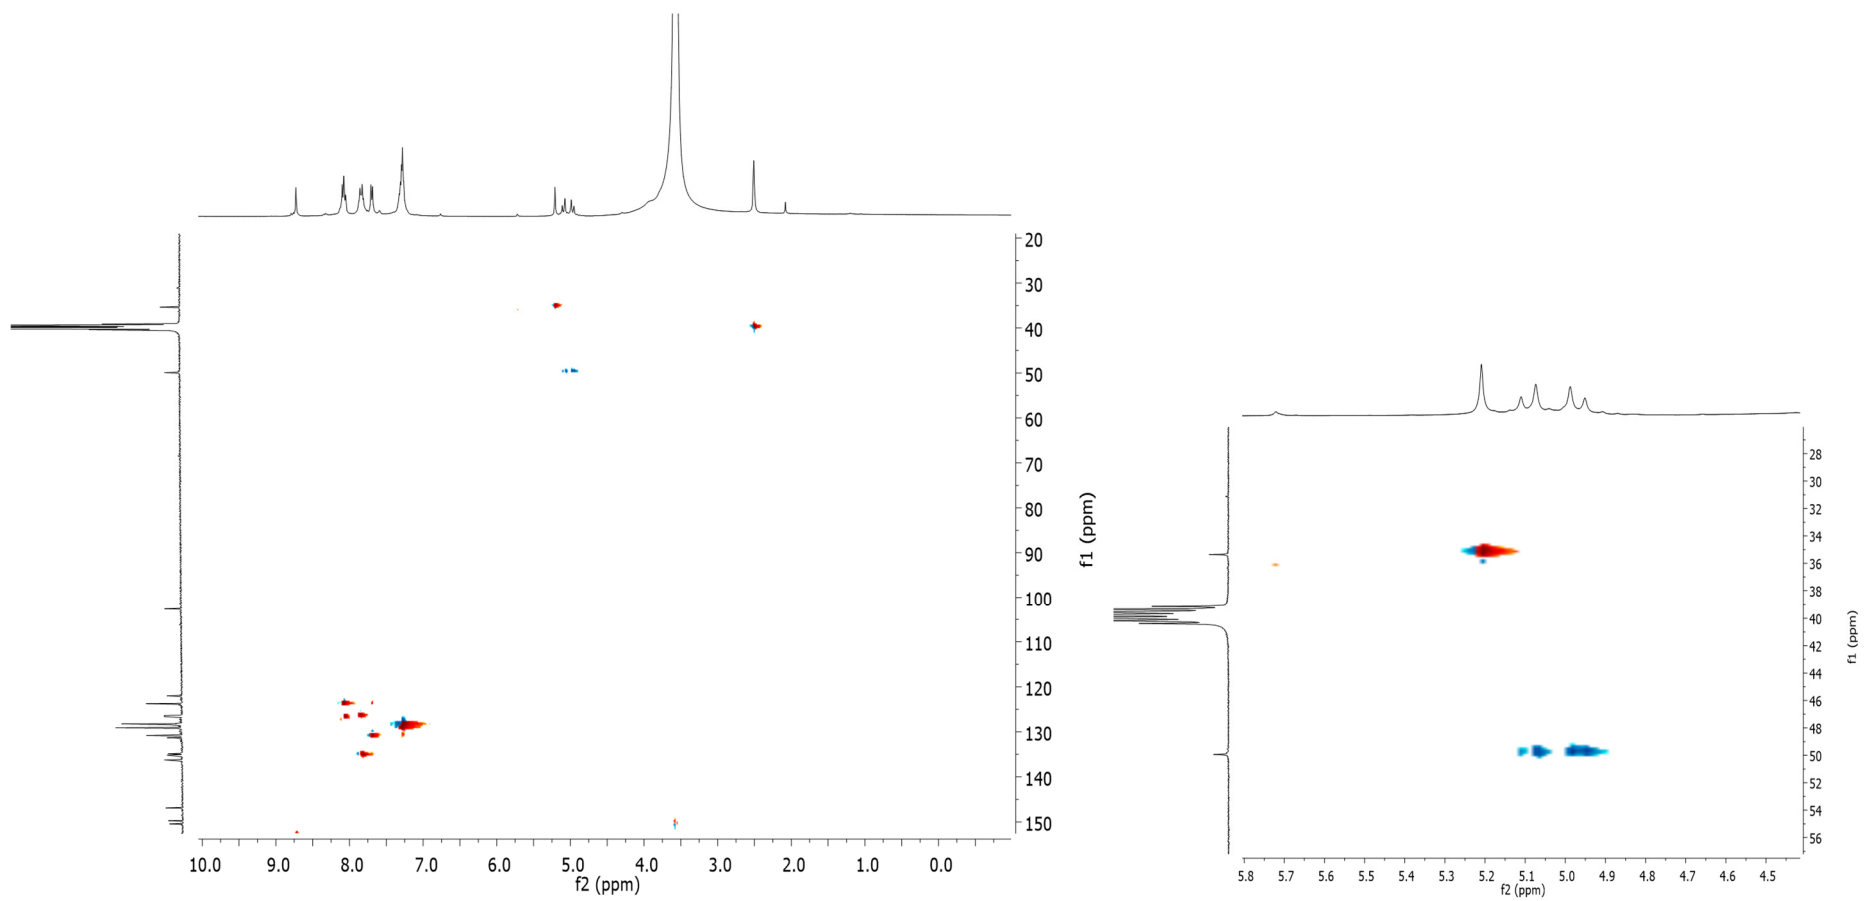

2D HSQC spectrum of compound **3h**



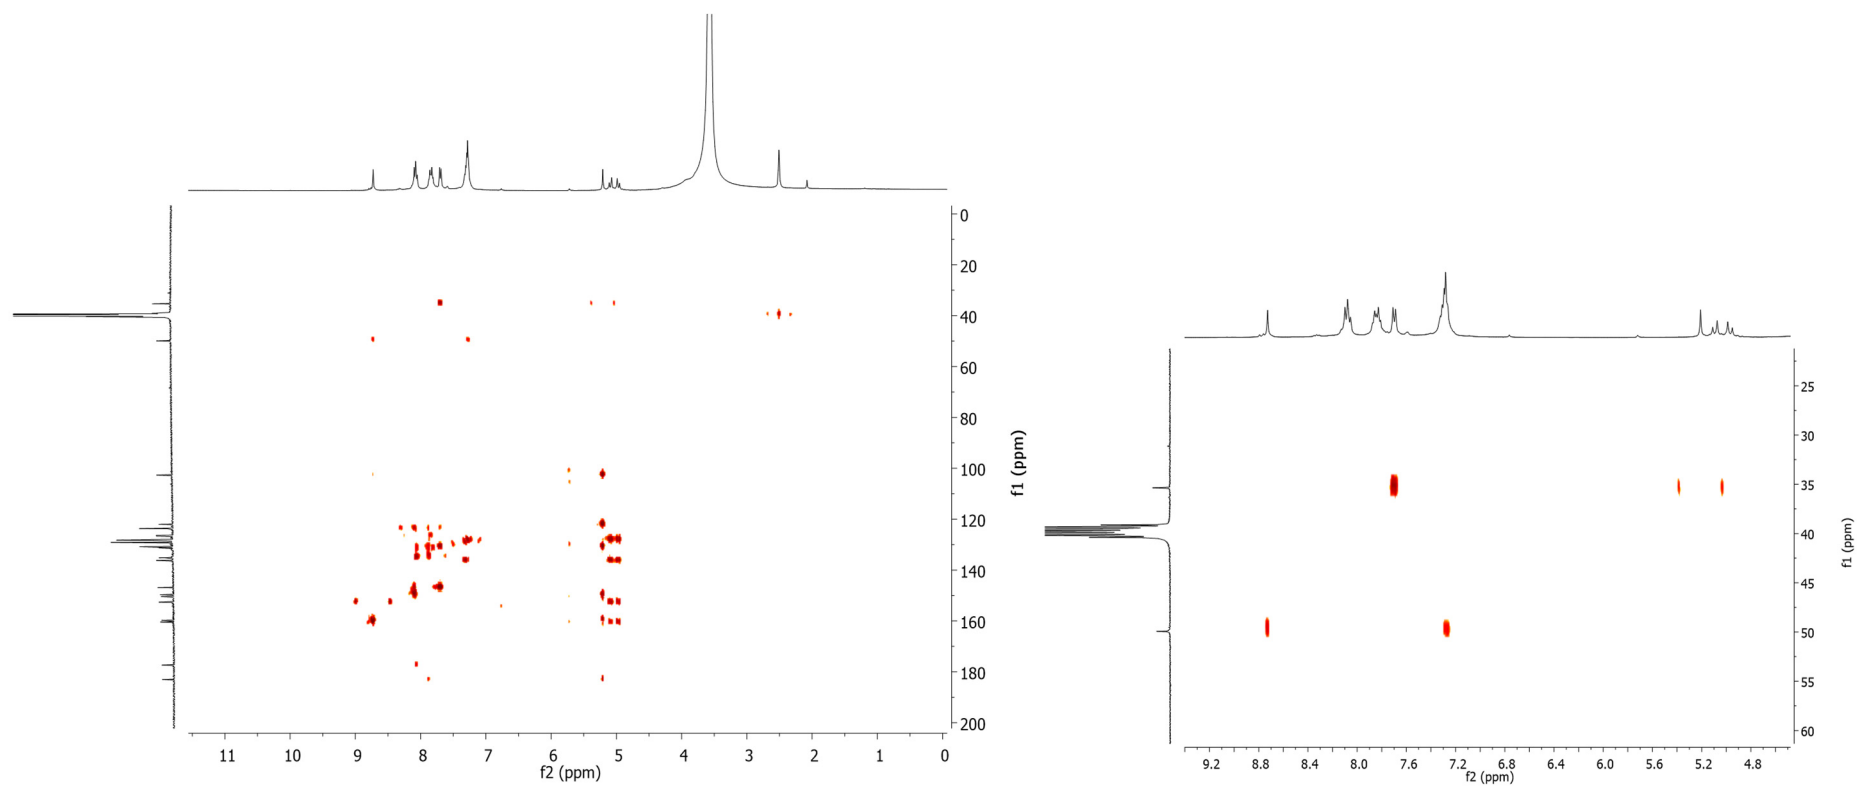

2D HMBC spectrum of compound **3h**

EmCh-8-H #85 RT: 0.83 AV: 1 NL: 5.07E7

T: FTMS + p ESI Full ms [50.0000-750.0000]

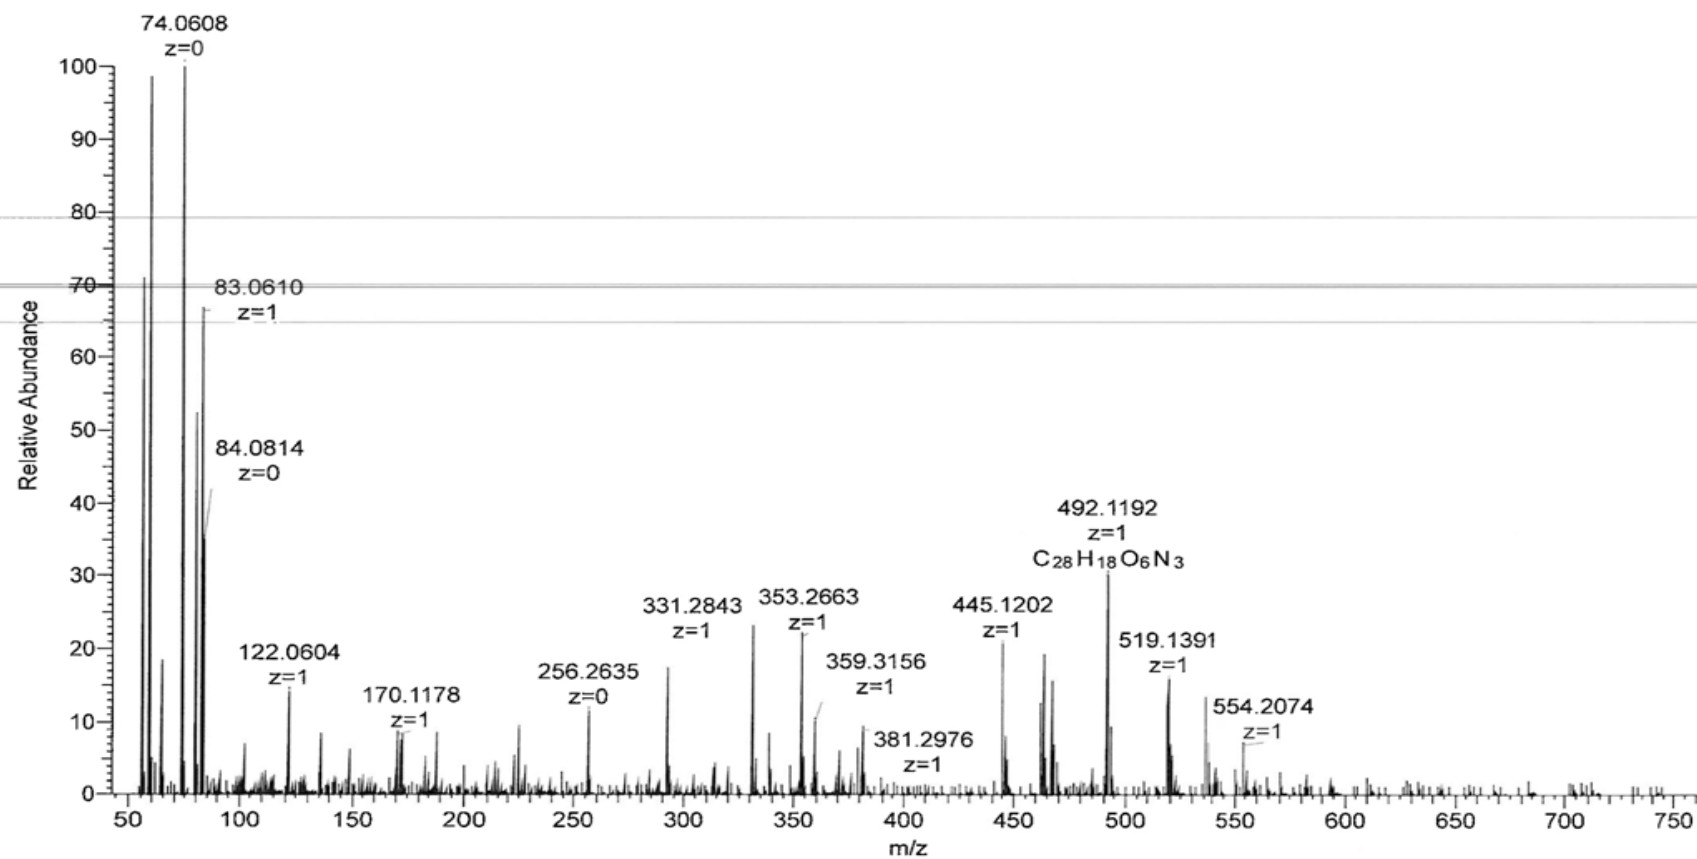

| Peak Mass | Display Formula                                               | Delta [ppm] | Theo. mass<br>(Collection) | Combined Score | Pattern Cov. [%] | MSMS Matched Fragments |
|-----------|---------------------------------------------------------------|-------------|----------------------------|----------------|------------------|------------------------|
| 492.1192  | C <sub>28</sub> H <sub>18</sub> O <sub>6</sub> N <sub>3</sub> | 0.32        | 492.11901                  | 95.55          | 99.44            |                        |

HRMS spectrum of compound **3h** (ESI,  $M+H^+$ )

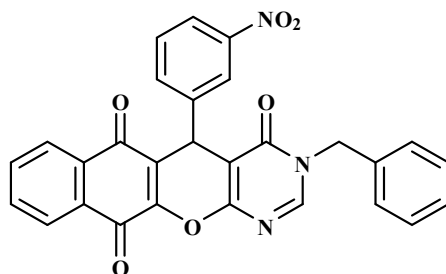

**3-Benzyl-5-(3-nitrophenyl)-3,5-dihydro-4H-benzo[6,7]chromeno[2,3-d]pyrimidine-4,6,11-trione (3i):** It was obtained as an orange solid, yield: 52%, m.p.: 258-260 °C.  $^1\text{H}$  NMR (400 MHz, DMSO-*d*6)  $\delta_{\text{H}}$  (ppm): 8.76 (s, 1H,  $\text{CH}_{\text{pyrimidine}}$ ), 8.24 (s, 1H), 8.06-8.04 (m, 2H), 7.89-7.85 (m, 4H), 7.56 (m, 1H), 7.29 (m, 5H), 5.25 (s, 1H,  $\text{CH}_{\text{pyran}}$ ), 5.12 (d,  $J=14.7$  Hz, 1H,  $\text{CH}_2$ ), 4.98 (d,  $J=14.7$  Hz, 1H,  $\text{CH}_2$ ).  $^{13}\text{C}$  NMR (100 MHz, DMSO-*d*6)  $\delta_{\text{C}}$  (ppm): 183.0, 177.3, 160.4, 159.7, 152.7, 150.5, 148.0, 144.4, 136.3, 136.1, 135.0, 134.7, 131.4, 131.2, 130.1, 129.0 (2C), 128.3, 128.2 (2C), 126.6, 126.3, 124.0, 122.6, 121.8, 102.8, 49.9, 35.2. HRMS (ESI,  $\text{M}+\text{H}^+$ ): calcd for  $\text{C}_{28}\text{H}_{18}\text{N}_3\text{O}_6$ ; 492.1196, found; 492.1190.

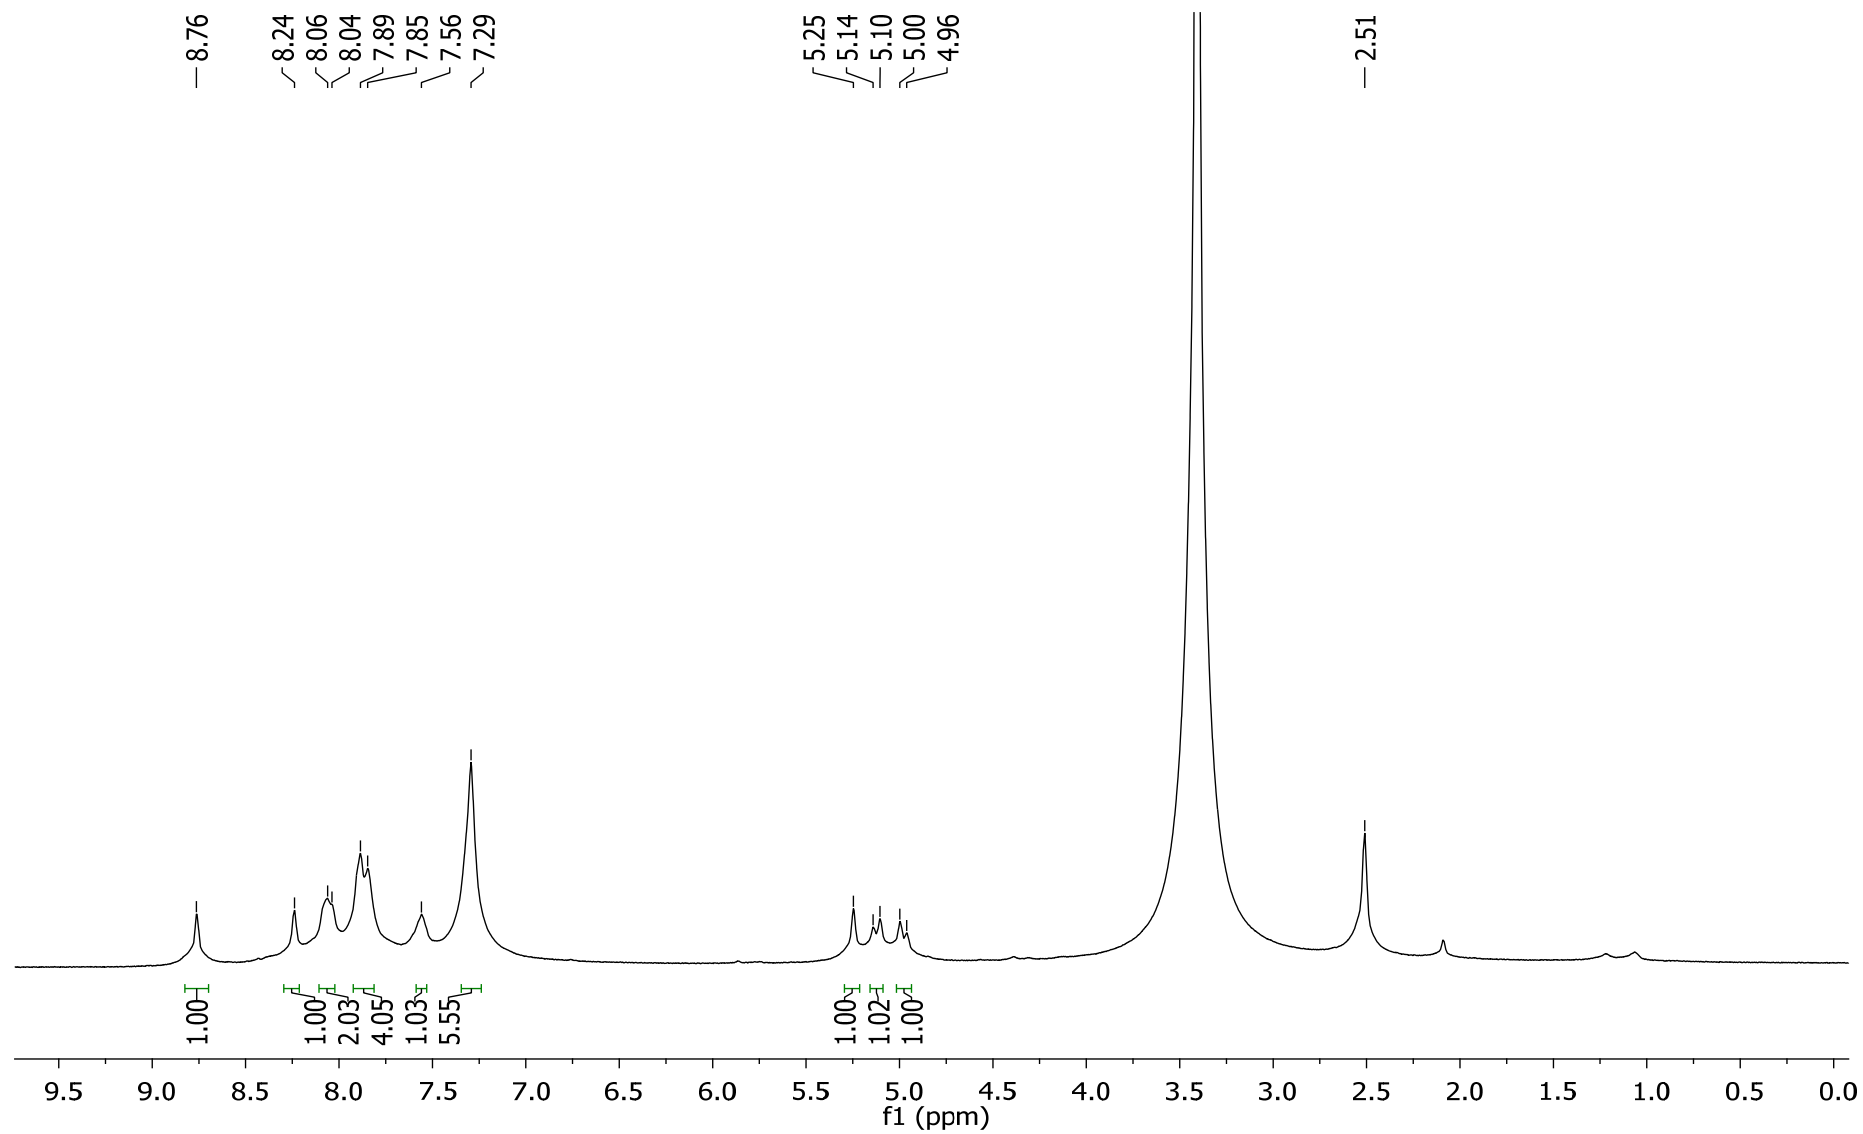

<sup>1</sup>H NMR of compound **3i** (400 MHz, DMSO-*d*<sub>6</sub>)

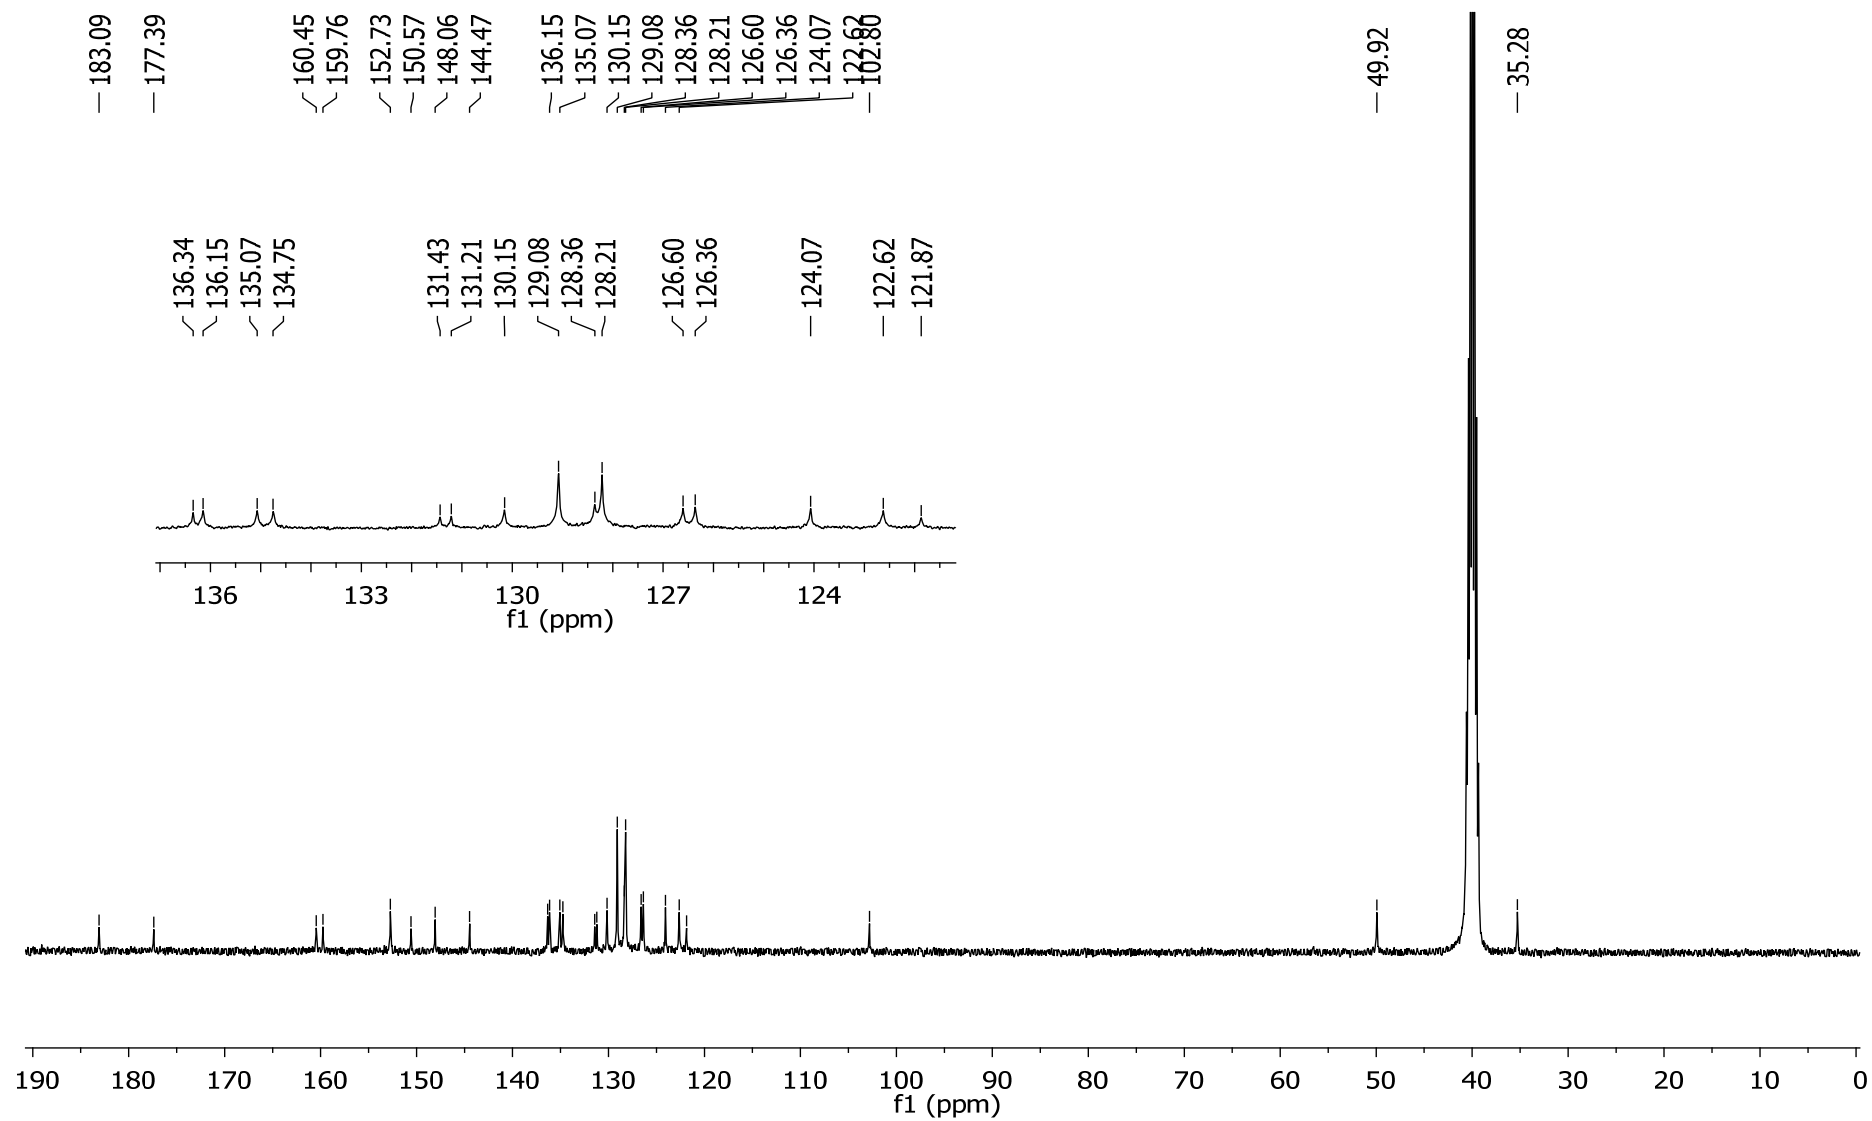

$^{13}\text{C}$  NMR of compound **3i** (100 MHz,  $\text{DMSO}-d_6$ )

EmCh-8-I #81 RT: 0.79 AV: 1 NL: 5.14E7

T: FTMS + p ESI Full ms [50.0000-750.0000]

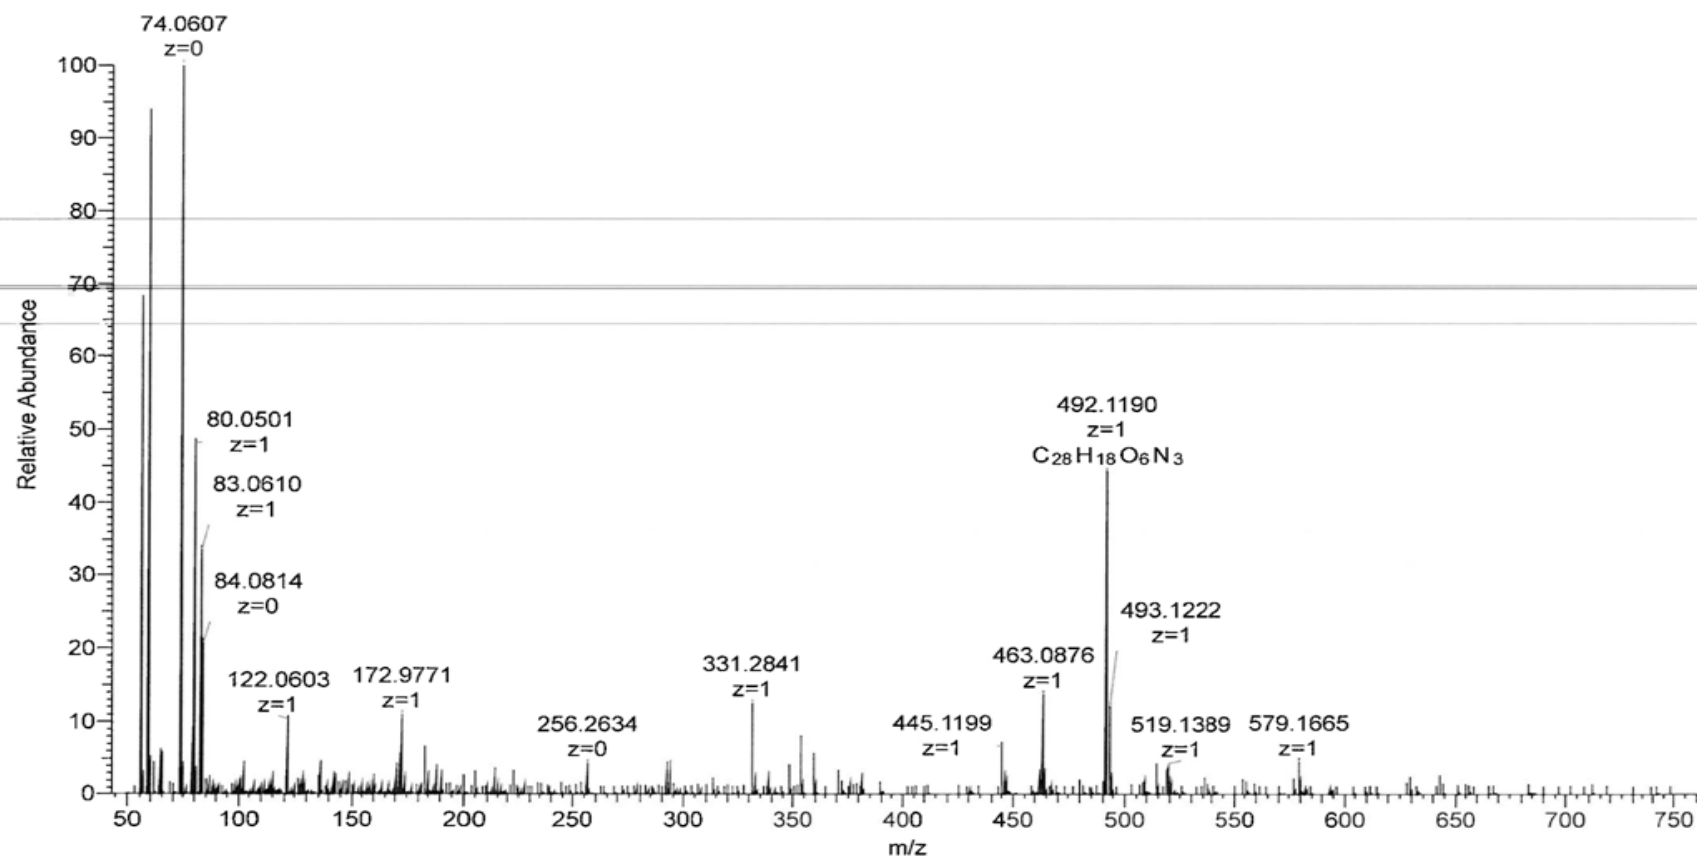

| Peak Mass | Display Formula      | Delta [ppm] | Theo. mass | Combined Score | Pattern Cov. [%] | MSMS Matched Fragments |
|-----------|----------------------|-------------|------------|----------------|------------------|------------------------|
| 492.1190  | $C_{28}H_{18}O_6N_3$ | -0.05       | 492.11901  | 98.22          | 100              | (Collection)           |

HRMS spectrum of compound **3i** (ESI,  $M+H^+$ )

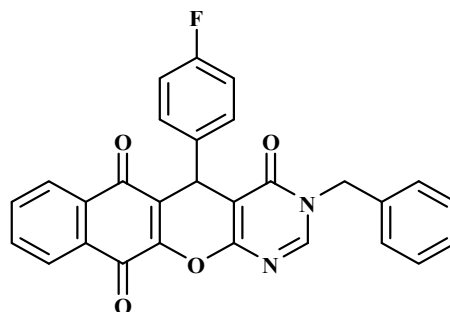

**3-Benzyl-5-(4-fluorophenyl)-3,5-dihydro-4H-benzo[6,7]chromeno[2,3-d]pyrimidine-4,6,11-trione (3j):** It was obtained as an ochre yellow solid, yield: 51%, m.p.: > 260 °C.  $^1\text{H}$  NMR (400 MHz, DMSO-*d*6)  $\delta_{\text{H}}$  (ppm): 8.73 (s, 1H,  $\text{CH}_{\text{pyrimidine}}$ ), 8.09-8.07 (m, 1H), 7.93-7.83 (m, 3H), 7.45-7.42 (m, 2H), 7.33-7.26 (m, 5H), 7.09-7.05 (m, 2H), 5.13 (d,  $J$ = 14.7 Hz, 1H,  $\text{CH}_2$ ), 5.12 (s, 1H,  $\text{CH}_{\text{pyran}}$ ), 4.99 (d,  $J$ = 14.7 Hz, 1H,  $\text{CH}_2$ ).  $^{13}\text{C}$  NMR (100 MHz, DMSO-*d*6)  $\delta_{\text{C}}$  (ppm): 183.1, 177.4, 160.4, 159.6, 152.3, 150.1, 138.6, 136.4, 135.0, 134.7, 131.4 (2C), 131.2, 131.1, 129.0 (2C), 128.3, 128.2 (2C), 126.6, 126.3, 122.9, 115.5, 115.3, 103.5, 49.8, 34.2. HRMS (ESI,  $\text{M}+\text{H}^+$ ): calcd for  $\text{C}_{28}\text{H}_{18}\text{FN}_2\text{O}_4$ ; 465.1251, found; 465.1244.

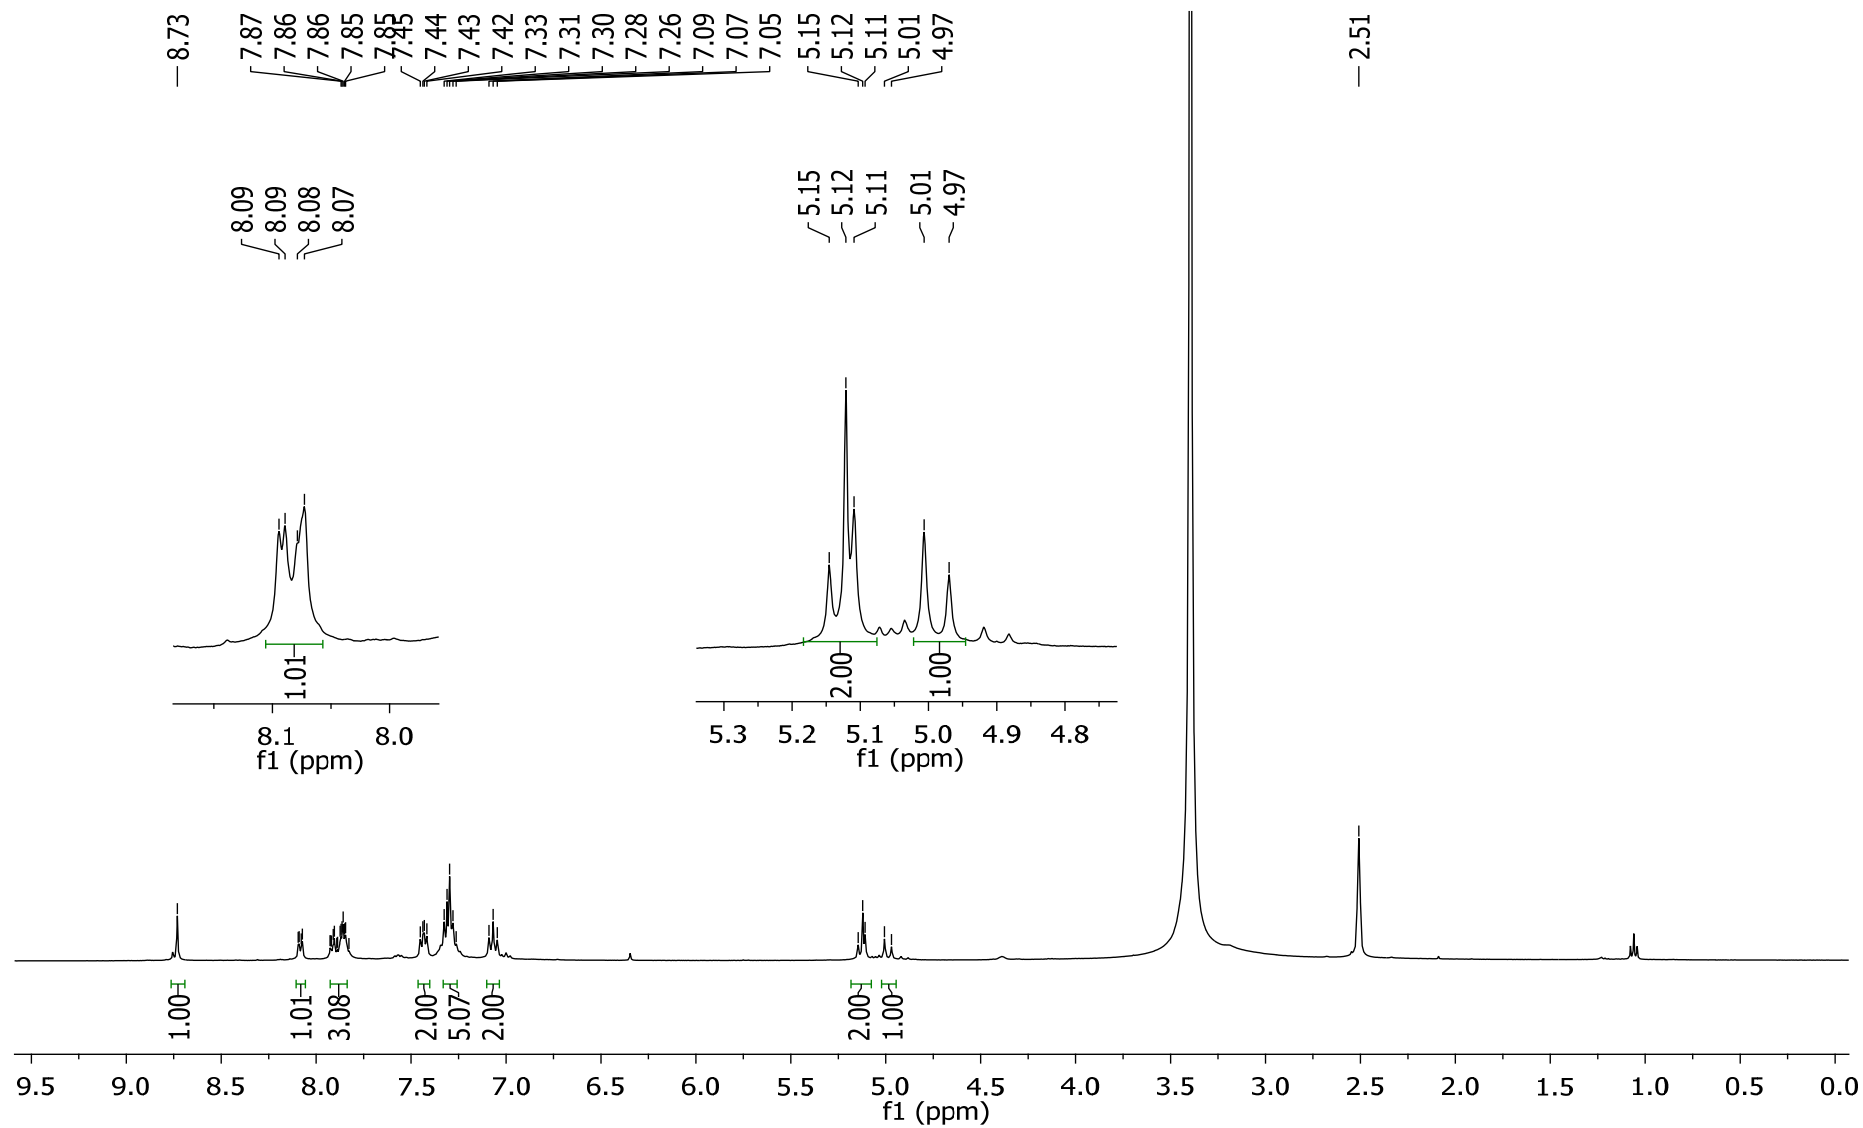

<sup>1</sup>H NMR of compound **3j** (400 MHz, DMSO-*d*<sub>6</sub>)



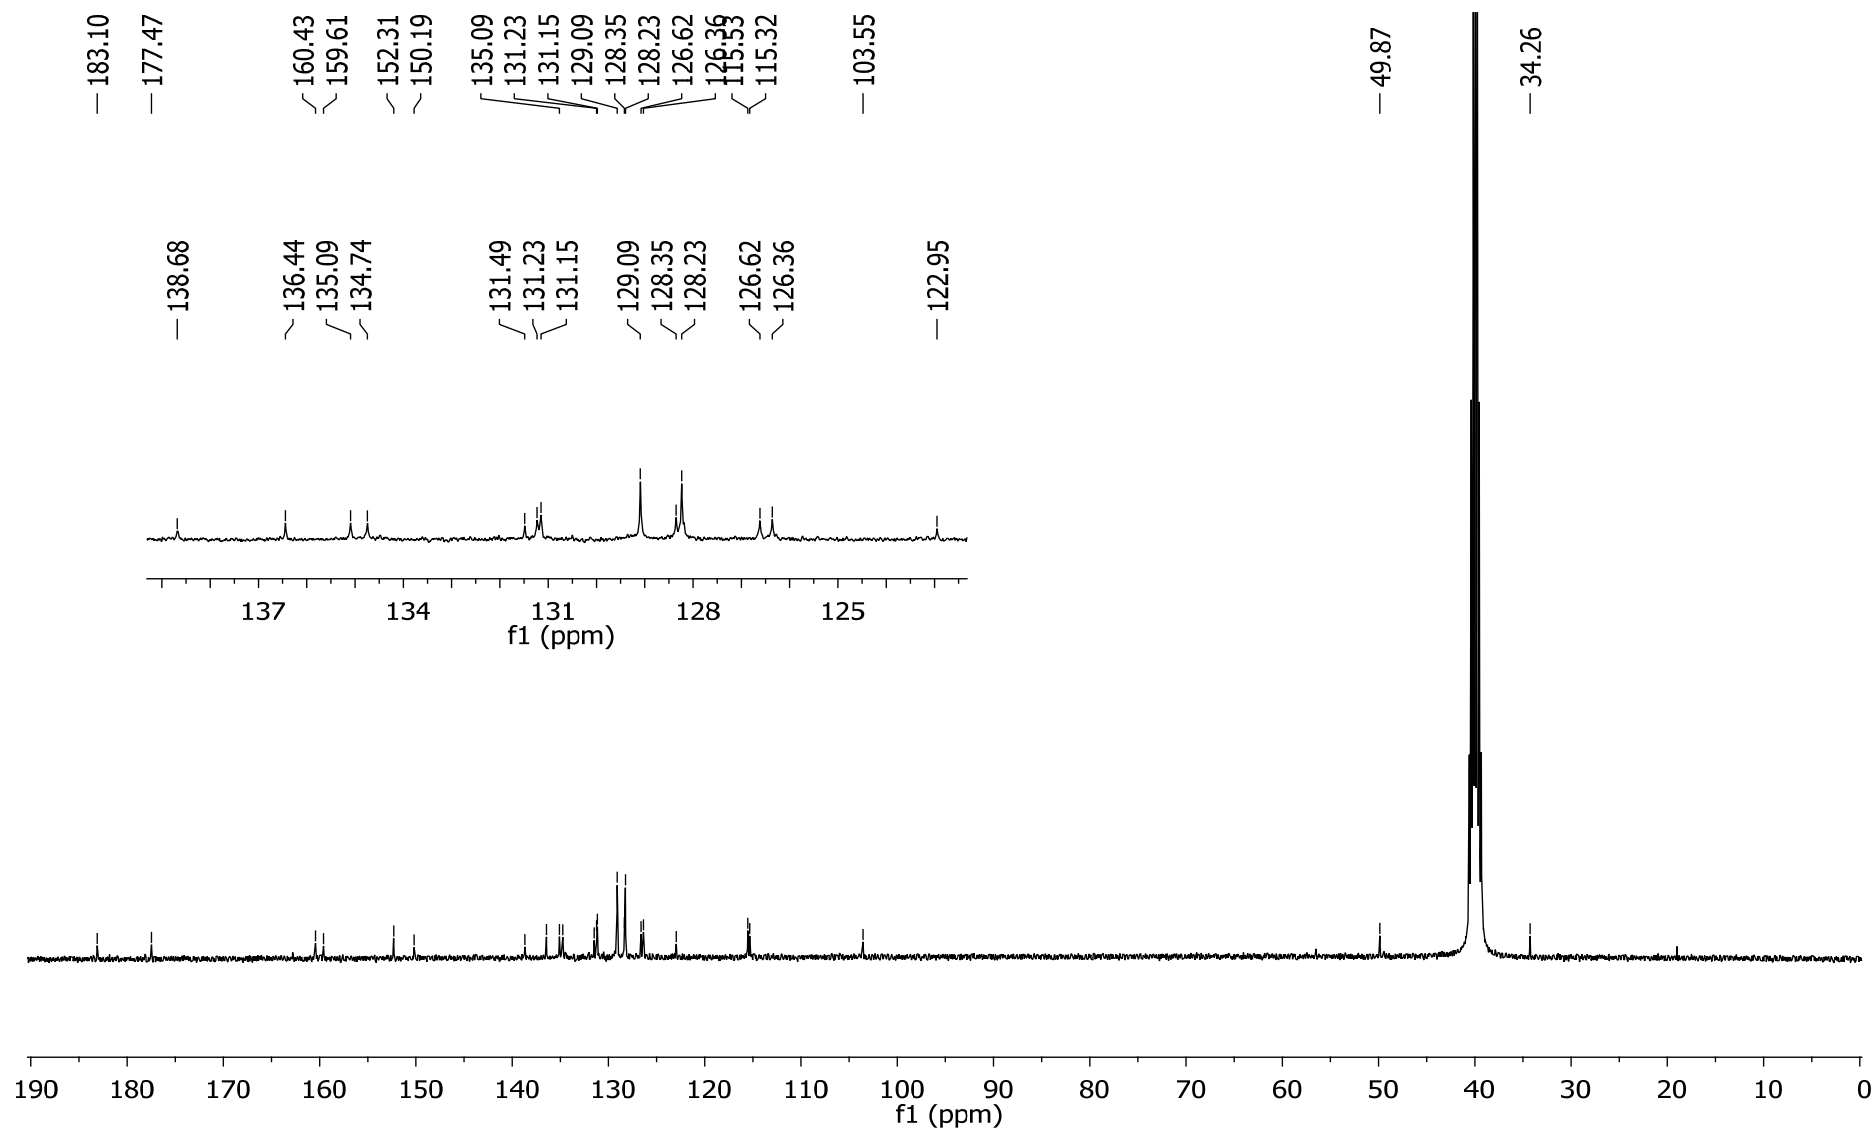

$^{13}\text{C}$  NMR of compound **3j** (100 MHz,  $\text{DMSO-}d_6$ )

EmCh-8-J #91 RT: 0.89 AV: 1 NL: 6.19E7

T: FTMS + p ESI Full ms [50.0000-750.0000]

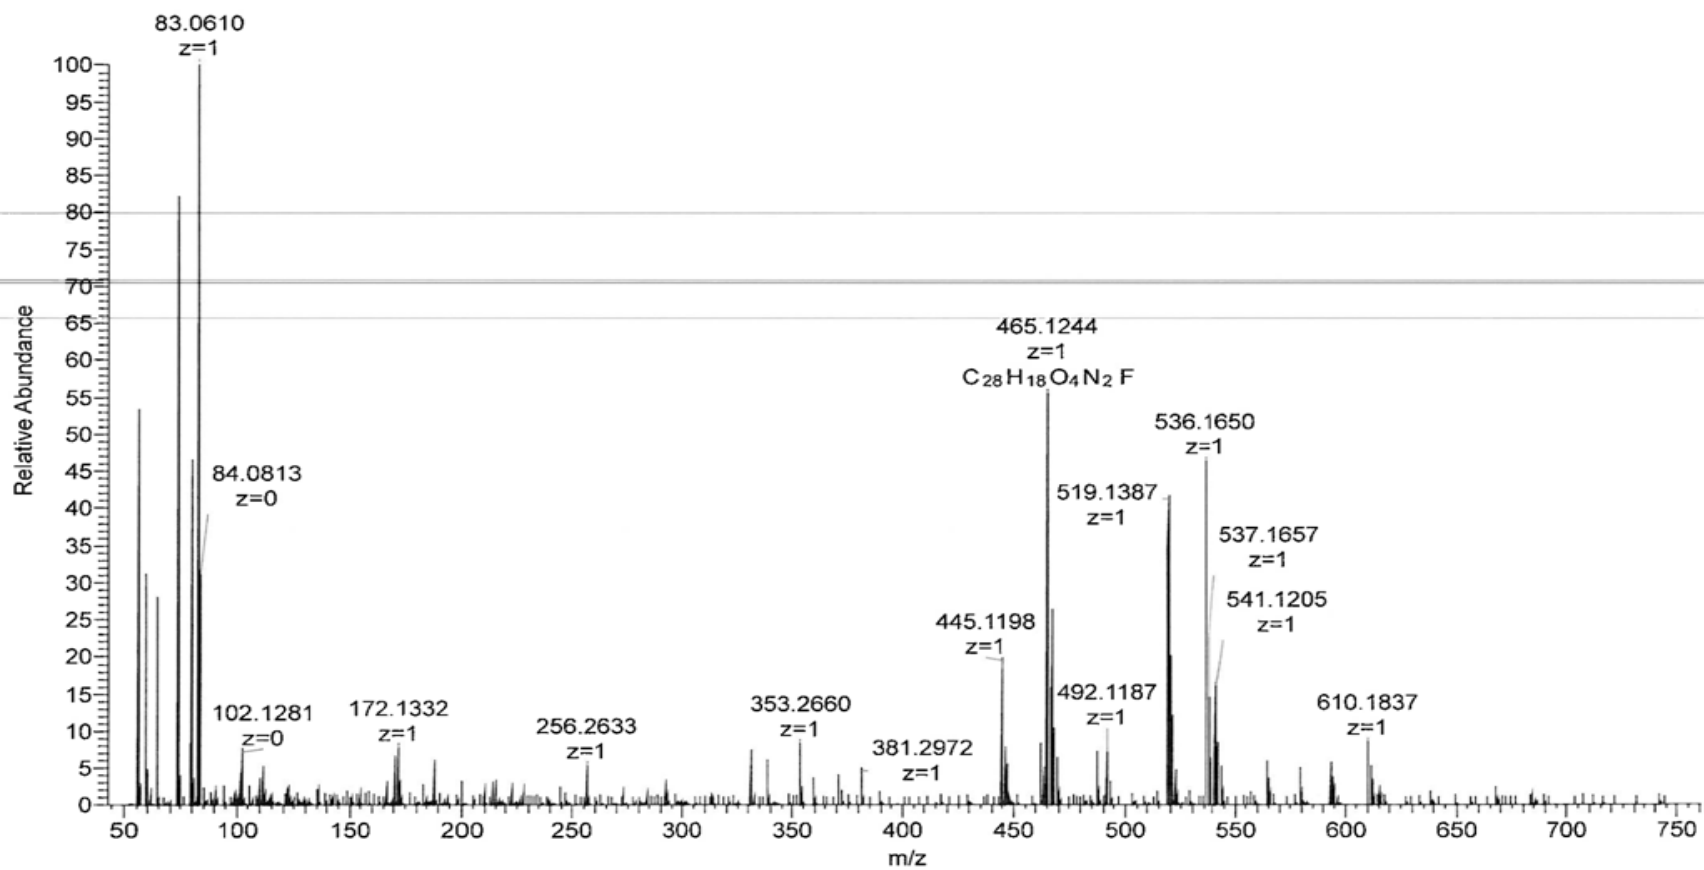

| Peak Mass | Display Formula                                                 | Delta [ppm] | Theo. mass | Combined Score | Pattern Cov. [%] | MSMS Matched Fragments |
|-----------|-----------------------------------------------------------------|-------------|------------|----------------|------------------|------------------------|
| 465.1244  | C <sub>28</sub> H <sub>18</sub> O <sub>4</sub> N <sub>2</sub> F | -0.26       | 465.12451  | 66.66          | 100              | (Collection)           |

HRMS spectrum of compound **3j** (ESI, M+H<sup>+</sup>)
